1 Calretinin positive neurons form an excitatory amplifier network in the spinal cord dorsal horn

2 KM Smith<sup>1</sup>, TJ Browne<sup>1</sup>, O Davis<sup>2</sup>, A Coyle<sup>2</sup>, KA Boyle<sup>2</sup>, M Watanabe<sup>3</sup>, SA Dickinson<sup>1</sup>, JA Iredale<sup>1</sup>, MA  
3 Gradwell<sup>1</sup>, P Jobling<sup>1</sup>, RJ Callister<sup>1</sup>, CV Dayas<sup>1†</sup>, DI Hughes<sup>2†</sup> & BA Graham<sup>1†\*</sup>

4 <sup>1</sup> School of Biomedical Sciences & Pharmacy, Faculty of Health, University of Newcastle, Callaghan; and  
5 Hunter Medical Research Institute (HMRI), New Lambton Heights, NSW, Australia.

6 <sup>2</sup> Institute of Neuroscience Psychology, College of Medical, Veterinary & Life Sciences, University of  
7 Glasgow, Glasgow, UK.

8 <sup>3</sup> Department of Anatomy, Hokkaido University School of Medicine, Sapporo 060-8638, Japan.

9 <sup>†</sup>Equal contribution

10 **Corresponding author:**

11 \*BA Graham: School of Biomedical Sciences and Pharmacy, Faculty of Health, University of Newcastle,  
12 Callaghan, NSW, 2308, Australia. Email: [brett.graham@newcastle.edu.au](mailto:brett.graham@newcastle.edu.au)

13

### Abstract

14 The passage of nociceptive information is relayed through the spinal cord dorsal horn, a critical area in  
15 sensory processing. The neuronal circuits in this region that underpin sensory perception must be clarified to  
16 better understand how dysfunction can lead to pathological pain. This study used an optogenetic approach to  
17 selectively activate neurons that contain the calcium-binding protein calretinin (CR). We show that CR<sup>+</sup>  
18 interneurons form an interconnected network that can initiate and sustain enhanced excitatory signaling, and  
19 directly relays signals to lamina I projection neurons. *In vivo* photoactivation of CR<sup>+</sup> interneurons resulted in  
20 a significant nocifensive behavior that was morphine sensitive and cause a conditioned place aversion.  
21 Furthermore, halorhodopsin-mediated inhibition of CR<sup>+</sup> interneurons elevated sensory thresholds. These  
22 results suggest that neuronal circuits in the superficial dorsal horn that involve excitatory CR<sup>+</sup> neurons are  
23 important for the generation and amplification of pain, and identify these interneurons as a future analgesic  
24 target.

25

## Introduction

26 All sensory information from the body, including nociception, is first relayed into the spinal cord dorsal horn  
27 (DH), where this afferent input can be modulated, gated and prioritized before being relayed to higher  
28 centers for sensory perception (Todd, 2010, Peirs and Seal, 2016). It is well established that alterations to  
29 neuronal circuits within the DH can directly contribute to neuropathic and inflammatory pain, as well as  
30 persistent itch (Basbaum et al., 2009, Braz et al., 2014). Despite this being a region of immense biological  
31 importance, our understanding of the neuronal circuits associated with particular sensory modalities remains  
32 limited (Todd, 2010, Peirs and Seal, 2016). To address this knowledge gap, several groups have recently  
33 implicated neurochemically-distinct subpopulations of DH interneurons with the perception of both acute  
34 and chronic pain states (Smith et al., 2015, Peirs et al., 2015, Petitjean et al., 2015, Duan et al., 2014).  
35 Historically, much of the research effort on DH circuits has focused on inhibition (Zeilhofer et al., 2012),  
36 and a growing number of discrete inhibitory interneuron populations have now been identified as substrates  
37 for sensory gating in the spinal cord (Petitjean et al., 2015, Duan et al., 2014, Foster et al., 2015, Cui et al.,  
38 2016). In contrast, our understanding of the role excitatory interneurons play in sensory processing is far less  
39 developed. Generally, excitatory DH populations are considered to provide polysynaptic relays linking  
40 circuits dedicated to innocuous and noxious sensory input, with inhibitory populations normally modulating  
41 the passage of information through these pathways (Duan et al., 2014, Takazawa and MacDermott, 2010,  
42 Punnakkal et al., 2014). Such a limited role for excitatory interneurons is surprising given they outnumber  
43 inhibitory interneurons by 2:1 in superficial laminae (Polgar et al., 2013), suggestive of a more complex role.  
44 Furthermore, detailed paired recording studies have also shown that ~85% of the synaptic connections in the  
45 DH are excitatory (Santos et al., 2007).  
46 Notably, we have recently shown that most calretinin-expressing (CR) neurons in laminae I and II exhibit  
47 specific electrophysiological, morphological and neurochemical properties consistent with an excitatory  
48 phenotype and respond to noxious peripheral stimulation (Smith et al., 2015, Smith et al., 2016). In fact,  
49 chemogenetic activation of CR<sup>+</sup> neurons has been shown to cause nocifensive behaviors and DH activation  
50 patterns consistent with mechanical hypersensitivity (Peirs et al., 2015), whereas genetic ablation of CR<sup>+</sup>  
51 neurons can cause a selective loss of light punctate touch sensation (Duan et al., 2014). Prior work has  
52 established that a specific excitatory interneuron population in the deep dorsal horn that transiently express

53 VGLUT3 relays low threshold input to CR<sup>+</sup> neurons (Peirs et al., 2015), however, a major limitation remains  
54 the lack of detailed information on the postsynaptic circuits engaged by the CR<sup>+</sup> population to drive  
55 behavioral responses.

56

57 Here, we take an optogenetic approach to resolve the neuronal circuits excited by CR<sup>+</sup> neurons in laminae I  
58 and II, and determine the functional significance of these neurons for sensory processing and perception. The  
59 postsynaptic targets of CR<sup>+</sup> neurons were identified combining optogenetic stimulation with *in vitro*  
60 electrophysiology, and also producing activation maps in anesthetized animals. This identified somatostatin<sup>+</sup>  
61 neurons, neurokinin 1 receptor positive spinoparabrachial projection neurons, and CR<sup>+</sup> neurons themselves  
62 among recipient populations for CR<sup>+</sup> input. Together, these populations form a highly integrated excitatory  
63 network that is able to amplify dorsal horn circuit activity including downstream neural targets. Using *in vivo*  
64 optogenetic stimulation in awake and behaving animals we were also able to show that spinal activation of  
65 CR<sup>+</sup> neurons induces nocifensive behavior.

66

## Results

### 67 *Optogenetic activation of spinal CR<sup>+</sup> neurons*

68 To study spinal CR<sup>+</sup> neuron connectivity and function in sensory processing, CR-Cre mice (Cr-IRES-Cre)  
69 were crossed with loxP-flanked-ChR2-eYFP mice (Ai32) to generate offspring where ChR2 was expressed  
70 in CR<sup>+</sup> neurons (CR<sup>Cre</sup>;Ai32). These mice exhibited characteristic ChR2-eYFP expression in neurons and  
71 fibers located in the superficial DH of the spinal cord forming a plexus that was concentrated in lamina IIo  
72 (Supplementary Figure 1A). This is consistent with the known pattern of CR expression in this spinal cord  
73 region (Lu and Perl, 2003). Comparison with immunolabelling for CR confirmed ChR2-eYFP expression was  
74 highly localized to the CR<sup>+</sup> population with  $78.3 \pm 4\%$  (St. Dev.) of CR<sup>+</sup> neurons expressing ChR2-eYFP  
75 (1454 cells counted in 3 animals), and  $71.5\% \pm 2\%$  of ChR2-eYFP<sup>+</sup> neurons expressing CR (1767 cells  
76 counted in 3 animals). Consistent with our previous work, most CR neurons exhibited characteristic  
77 electrophysiological features indicative of excitatory interneurons (Supplementary Figure 1B). In voltage  
78 clamp, these ChR2-eYFP expressing cells exhibited robust inward photocurrents in response to  
79 photostimulation ( $n = 29$  cells from 16 animals), which increased with stimulation intensity (0.01-16 mW,  
80 Supplementary Figure 1C). In current clamp, photostimulation evoked AP discharge, and the ChR2-eYFP  
81 neurons were able to reliably follow repetitive stimulation trains up to 10 Hz, however, reliability decreased  
82 at higher frequencies (Supplementary Figure 1D). The latency between photostimulation onset and AP  
83 discharge (i.e. recruitment delay) across this sample was  $3.29 \pm 0.21$  ms. We also assessed whether the  
84 subset of CR<sup>+</sup> neurons, identified in our previous work as inhibitory interneurons (*Atypical CR<sup>+</sup> neurons*)  
85 expressed ChR2-eYFP ( $n = 13$  cells from 9 animals). These cells exhibit morphological and  
86 electrophysiological features consistent with an inhibitory phenotype (Supplementary Figure 2A).  
87 Photostimulation in this inhibitory subset of ChR2-eYFP expressing neurons evoked larger inward  
88 photocurrents than observed in the excitatory population ( $459.72 \pm 34.85$  pA vs.  $233.66 \pm 56.16$  pA), which  
89 similarly increased with photostimulation intensity (Supplementary Figure 2B). The inhibitory ChR2-eYFP  
90 population could also reliably follow repetitive photostimulation at rates up to 10Hz, but had a shorter  
91 recruitment time than excitatory ChR2-eYFP neurons ( $2.39 \pm 0.21$  ms vs.  $3.29 \pm 0.38$  ms, Supplementary  
92 Figure 2C). Together, these data indicate the CR<sup>Cre</sup>;Ai32 mouse provides optogenetic control of both  
93 excitatory and inhibitory CR<sup>+</sup> populations.

94 ***CR-ChR2-activated microcircuits***

95 Channelrhodopsin-2 assisted circuit mapping (CRACM) was used to study the connectivity of CR-ChR2  
96 neurons within DH microcircuits. Brief full-field photostimulation (16 mW, 1 ms) was applied to assess  
97 excitatory postsynaptic responses across various DH populations (n = 73 cells from 27 animals). Strikingly,  
98 robust synaptic responses were observed in the CR-ChR2 neurons themselves (Figure 1B). Specifically,  
99 photostimulation of CR<sup>+</sup> neurons produced responses that included an immediate photocurrent and short  
100 latency optically evoked excitatory postsynaptic currents (oEPSCs) that were blocked by bath applied  
101 CNQX (10 μM). In order to analyse the oEPSCs, pharmacologically isolated photocurrents (after CNQX)  
102 were first subtracted from the original response, separating oEPSCs (Supplementary Figure 3A). oEPSCs  
103 were observed in 96.5% of these recordings (28/29) indicating a high degree of interconnectivity in the CR-  
104 ChR2 population. A defined window for direct connection latencies was characterised by adding a delay of  
105 2.5 ms (taken from previous paired recording studies(Santos et al., 2007, Lu and Perl, 2003)) to the average  
106 AP recruitment delay for excitatory CR<sup>+</sup> neurons (3.29 ± 0.38 ms, Supplementary Figure 1), allowing for AP  
107 conduction and synaptic delay. The distribution of oEPSC latencies in CR-ChR2 neurons suggested they  
108 receive both a direct and delayed input following photostimulation (35% direct, 65% delayed,  
109 Supplementary Figure 4A).

110 CRACM was also applied while recording from neurons lacking ChR2 both within or dorsal to the CR<sup>+</sup>  
111 plexus (LII<sub>0</sub>), showing that both plexus (32/40) and dorsal (22/24) populations received CR-ChR2 neuron  
112 input (Figure 1B). Using the same defined window for direct and delayed input, plexus recordings received  
113 mostly direct input (75% direct, 25% delayed, Supplementary Figure 4A), whereas recordings dorsal to the  
114 CR<sup>+</sup> plexus exhibited a similar level of direct and delayed oEPSC input (57% direct, 43% delayed,  
115 Supplementary Figure 4A). Comparison of oEPSC characteristics identified a significantly shorter onset of  
116 the oEPSC response (Figure 1B) for neurons within the CR<sup>+</sup> plexus compared to other populations (plexus =  
117 4.75 ± 0.59 ms vs. CR-ChR2 = 8.61 ± 1.23 ms, p=0.012; dorsal = 7.34 ± 1.06 ms, p=0.047). In contrast,  
118 oEPSC time-course was similar across recordings (Table 1; rise time: CR-ChR2 = 2.68 ± 0.41 ms; plexus =  
119 2.89 ± 0.63 ms; and dorsal = 3.22 ± 0.64 ms. Half Width: CR-ChR2 = 4.90 ± 0.62 ms; plexus = 5.40 ± 1.60  
120 ms; and dorsal = 6.61 ± 1.16 ms). These features combined to generate similar oEPSC charge across the  
121 sampled populations (CR-ChR2 = 0.66 ± 0.20 pA.s; plexus = 0.52 ± 0.17 pA.s; dorsal = 1.93 ± 0.98 pA.s).

122 Thus, activation of CR-ChR2 neurons produces excitation that unsurprisingly arrives first on nearby  
123 populations within the ChR2-eYFP plexus, before it reaches neurons dorsal to this region. In addition,  
124 interconnectivity of CR-ChR2 neurons indicates they form an excitatory network likely to enhance activity  
125 within the DH when recruited.

126 The impact of CR-ChR2 photostimulation on the activity of postsynaptic populations was also assessed in  
127 current clamp (n = 22 cells from 12 animals). Three response types were typically distinguished in these  
128 recordings; i) subthreshold excitatory responses, ii) suprathreshold excitatory responses (i.e. evoked AP  
129 discharge), and iii) inhibitory responses (Figure 1C). Responses were assessed in neurons within the ChR2-  
130 YFP plexus ( and dorsal to this region, but not CR-ChR2 neurons, as they were directly activated to  
131 photostimulation. The incidence of each responses was similar among the ChR2-eYFP plexus and dorsal  
132 recordings (Figure 1D) including excitatory (56.3% and 66.6%) and inhibitory (37.5% and 25%) responses,  
133 with few neurons responding with AP discharge (6.2% and 8.4%).

134 Given the appearance of inhibitory responses in the above recordings, and the likelihood that inhibitory CR-  
135 ChR2 neurons were also activated by photostimulation, CRACM also assessed inhibitory connections within  
136 the dorsal horn (n = 29 cells from 13 animals). Optically evoked inhibitory postsynaptic currents (oIPSCs)  
137 were observed in all neuron populations studied (Figure 1E - CR-ChR2 10/11, plexus 16/19, and dorsal  
138 neurons 4/7). Comparison of oIPSC characteristics showed that oIPSC latency was similar among these  
139 recordings (CR-ChR2 =  $7.9 \pm 0.5$  ms, and dorsal =  $5.7 \pm 0.1$  ms). To determine the contribution of direct and  
140 delayed circuits to this response, a latency window for oIPSC components to be considered direct was  
141 calculated (as above for oEPSCs) using the inhibitory CR-ChR2 neuron recruitment latency of  $2.39 \pm 0.21$   
142 ms, and 2.5 ms to account for AP conduction and synaptic delay (Santos et al., 2007, Lu and Perl, 2003). All  
143 neuron types exhibited responses consistent with direct and delayed oIPSC components (Supplementary  
144 Figure 4B). Delayed oIPSCs components dominated in neurons within the CR<sup>+</sup> plexus (80.5% delayed vs.  
145 19.5% direct), whereas a similar mix of direct and delayed oIPSC components were recorded in excitatory  
146 CR-ChR2 neurons and neurons dorsal to the CR<sup>+</sup> plexus (excitatory CR-ChR2 = 53% delayed vs. 47%  
147 direct, and dorsal 59% delayed vs. 41% direct). Other oIPSC properties were generally similar across neuron  
148 types (Table 1). Importantly, as both GABA and glycine can mediate fast synaptic inhibition in the spinal  
149 DH, sequential pharmacology was used to differentiate these neurotransmitters. Photostimulation-evoked

150 oIPSC responses were isolated by bath application of CNQX (10  $\mu$ M) and then GABAergic oIPSC  
151 components were blocked with bicuculline (10  $\mu$ M), before any remaining oIPSCs were abolished with  
152 strychnine (1  $\mu$ M). Comparison of oIPSCs recorded before and after bicuculline block assessed the  
153 contribution of GABA and glycine to these photostimulation responses. In this way, an oIPSC amplitude  
154 decrease of 80% or greater in bicuculline indicated GABA-dominant input, whereas a decrease of less than  
155 20% in bicuculline indicated a glycine-dominant input. oIPSCs with intermediate bicuculline-sensitivity  
156 were classified as mixed (i.e. both GABAergic and glycinergic). Across all recordings, GABA-dominant  
157 responses were most common (Figure 1F: excitatory-CR-ChR2 = 72%, plexus = 65%, dorsal = 58%).  
158 Glycine dominant responses were rare, and not observed at all in excitatory CR-ChR2 neurons, with  
159 remaining cells receiving mixed inhibition. Together, these data show that in addition to a range of excitatory  
160 circuits recruited by CR-ChR2 photostimulation, a widely distributed pattern of inhibition is also activated  
161 by CR-ChR2 neuron recruitment. Short latency direct inhibition likely comes through direct  
162 photostimulation of inhibitory CR-ChR2 neurons, whereas polysynaptic pathways recruited by  
163 photostimulation of excitatory CR-ChR2 neurons are best placed to produce longer latency indirect  
164 inhibitory responses.

165

### 166 *Plasticity in the CR-ChR2 network*

167 The interconnectivity of the CR-ChR2<sup>+</sup> population and multicomponent responses to brief photostimulation  
168 (direct and delayed) suggested these neurons might be capable of producing sustained activation within DH  
169 circuits. To test this hypothesis, photostimulation duration was extended (10 s @ 10 Hz, 10 ms pulses at 16  
170 mW) and spontaneous EPSC (sEPSC) frequency before and immediately following photostimulation were  
171 compared (Figure 2). Recordings in spinal slices from CR<sup>Cre</sup>;Ai32 animals (n = 4) targeted CR-ChR2<sup>+</sup>  
172 neurons due to their coupling and predominantly excitatory phenotype, but also sampled other unidentified  
173 DH neurons, and some inhibitory CR-ChR2<sup>+</sup> neurons (differentiated from the excitatory CR<sup>+</sup> population by  
174 their discharge characteristics). These recordings exhibited a range of pre-stimulation and post-stimulation  
175 sEPSC frequency relationships, however, post-stimulation sEPSC frequency was dramatically increased in a  
176 subset of CR-ChR2<sup>+</sup> neurons (Figure 2A-B). A threshold of 4 standard deviations above the mean pre-  
177 stimulation sEPSC frequency was set to confidently identify recordings with increased post-photostimulation



178 sEPSC frequency. Using this criterion one third of excitatory CR-ChR2<sup>+</sup> recordings (4/12) exhibited  
179 increased post-stimulation sEPSC frequency (Figure 2B). In contrast, poststimulation sEPSC frequency did  
180 not increase in unidentified DH neurons (0/9), or inhibitory CR-ChR2<sup>+</sup> neurons (0/5). While these  
181 potentiated responses could result from the specific connectivity patterns in the CR<sup>+</sup> network, they may also  
182 relate to direct activation of photocurrents in these neurons, or the magnitude of evoked oEPSC during  
183 photostimulation. Despite this, there was no correlation between the degree of potentiation and either  
184 photocurrent amplitude (Figure 2C left;  $r^2= 0.00002$ ) or oEPSC amplitude (Figure 2C right;  $r^2= 0.056$ ).  
185 Peristimulus histograms (Figure 2D) compared CR-ChR2<sup>+</sup> neuron responses that exhibited increased post-  
186 stimulation sEPSC frequency (n=4) with CR-ChR2<sup>+</sup> neurons that exhibited similar baseline sEPSC  
187 frequency but no poststimulation increase (n=5). This highlighted the dramatic and prolonged nature of  
188 enhanced excitatory synaptic activity in the post-stimulation period, taking ~20 seconds before returning to  
189 baseline. Together, these results are compatible with a model that features feedback excitation within the  
190 CR<sup>+</sup> network, capable of maintaining elevated excitatory signalling beyond the initial excitatory stimulus.

191

### 192 ***Distinct DH populations are activated by CR-ChR2 neurons***

193 To identify the DH populations postsynaptic to CR-ChR2 neurons, a deeply anesthetized preparation was  
194 used and photostimulation (10 mW, 10 ms @ 10 Hz for 10 min) was delivered to the exposed dorsal surface  
195 of the spinal cord in CR<sup>Cre</sup>;Ai32 mice. Spinal cords were subsequently processed and immunolabeled for the  
196 activity marker Fos, YFP, and neurochemical markers commonly used to differentiate DH populations  
197 implicated in pain pathways (Peirs and Seal, 2016, Duan et al., 2014). Robust Fos-protein induction was  
198 restricted to the photostimulation area (Figure 3A-B). Importantly, no Fos-positive profiles were found in  
199 control animals (identical photostimulation in CR<sup>GFP</sup> mice, n = 3 animals) confirming the specificity of  
200 photostimulation evoked Fos expression in CR<sup>Cre</sup>;Ai32 mice. Of the Fos<sup>+</sup> profiles, approximately one third  
201 expressed YFP ( $21.2 \pm 4.1$  of  $73.8 \pm 9.8$  neurons, 12 animals) indicating these neurons expressed ChR2 and  
202 were directly activated by photostimulation. The remaining two thirds of Fos<sup>+</sup> neurons represented  
203 postsynaptic targets of the CR-ChR2<sup>+</sup> population. Approximately 10% of these cells were NK1R-expressing  
204 lamina I neurons (Figure 3C,  $4.7 \pm 4.6$  of  $41.3 \pm 2.51$  neurons; 3 animals). As immunolabelling for NK1R  
205 was confined to the cell membrane and showed no evidence of internalisation, we conclude that activation of

206 these putative projection neurons resulted from glutamatergic synaptic input derived from photostimulated  
207 CR-ChR2<sup>+</sup> spinal interneurons or their postsynaptic targets.

208 Two additional excitatory interneuron populations were also differentiated by protein kinase C gamma  
209 (PKC $\gamma$ ) and somatostatin (SOM) expression (Figure 3D-E). Immunolabelling for SOM was present in 13%  
210 of Fos<sup>+</sup> cell profiles ( $10.7 \pm 2.3$  of  $80.3 \pm 21.2$  neurons; 3 animals), however, approximately half of these  
211 also expressed YFP ( $5 \pm 2.1$  of  $10.7 \pm 2.3$  neurons), consistent with the expected overlap between SOM and  
212 CR in lamina II neurons (Figure 3E). In contrast, we found no evidence of Fos<sup>+</sup> cells that also  
213 immunolabelled for PKC $\gamma$  (0 of  $76.3 \pm 5.8$  neurons; 3 animals), implying that this population of excitatory  
214 interneurons is not postsynaptic to the ChR2-YFP cells (Figure 3D). Finally, 23% of Fos<sup>+</sup> cells following  
215 spinal photostimulation were identified as inhibitory interneurons ( $21.3 \pm 13.0$  of  $97 \pm 28.4$  neurons; 3  
216 animals), by the expression of Pax2<sup>+</sup> immunolabelling (Figure 3F). Surprisingly, however, only 2% of this  
217 inhibitory population expressed YFP ( $1.3 \pm 1.2$  of  $21.3 \pm 13.0$ ; 3 animals), confirming inhibitory CR-ChR2  
218 neurons are also recruited during spinal photostimulation but these cells are in the minority. Therefore, a  
219 large population of inhibitory interneurons is also engaged by activation of the excitatory CR<sup>+</sup> population.  
220 The remaining Fos<sup>+</sup> cells are most likely to be other unidentified populations of excitatory interneurons, due  
221 to their absence of Pax2 labelling, and these may include excitatory CR<sup>+</sup> neurons that did not express ChR2-  
222 YFP (Figure 3G). The relative recruitment of each neurochemically defined population was also calculated  
223 yielding: 8.4% of all ChR2 neurons ( $21.17 \pm 4.01$  of  $251.17 \pm 43.31$  neurons), 21% of all NK1R<sup>+</sup> neurons  
224 ( $5.33 \pm 2.08$  of  $25 \pm 13.89$  neurons), 5.5% of all SOM<sup>+</sup> neurons ( $10.67 \pm 2.33$  of  $194.67 \pm 59.26$  neurons),  
225 0% of all PKC $\gamma$ <sup>+</sup> neurons ( $0 \pm 0$  of  $159 \pm 25.06$  neurons), and 15.3% of all Pax2<sup>+</sup> neurons ( $21.33 \pm 13.01$  of  
226  $139.33 \pm 37.57$  neurons). Taken together, these data show that activation of the CR-ChR2 network  
227 selectively recruits a diverse range of excitatory interneurons, inhibitory interneurons, and projection  
228 neurons.

### 229 ***CR<sup>+</sup>/SOM<sup>+</sup> neurons provide direct input to Projection neurons***

230 Current models for dorsal horn microcircuitry place CR<sup>+</sup> neurons in a polysynaptic circuit that signals  
231 through SOM<sup>+</sup> neurons to activate LI projection neurons and initiate pain signalling (Peirs et al., 2015). Our  
232 data is compatible with this model as CR<sup>+</sup> neuron photostimulation evoked oEPSCs in DH populations

233 (including populations located superficial to the CR<sup>+</sup> plexus), and produced robust cFos expression in both  
234 SOM<sup>+</sup> neurons and putative NK1R<sup>+</sup> LI projection neurons (Figure 3C). Since extensive co-localisation of  
235 CR<sup>+</sup> and SOM<sup>+</sup> has been reported previously (Gutierrez-Mecinas et al., 2016), it remained to be clarified how  
236 CR<sup>+</sup> network activity reached projection neurons. This issue was addressed using a neuroanatomical  
237 approach with CR-Cre mice (Cr-IRES-Cre) crossed with a loxP-flanked- Synaptophysin-tdTomato reporter  
238 line (Ai34) to generate offspring where tdTomato labelled synaptic vesicles in CR<sup>+</sup> neurons (CR<sup>Cre</sup>;Ai34).  
239 This allowed us to define CR<sup>+</sup> cells axon terminals with greater precision. Tissue from these animals was  
240 subsequently processed to identify putative LI PNs with NK1R<sup>+</sup> labelling, excitatory synapses using  
241 immunolabelling for Homer<sup>+</sup>, and SOM<sup>+</sup> labelling to differentiate inputs from CR<sup>+</sup> only, SOM<sup>+</sup> only, or  
242 CR<sup>+</sup>/SOM<sup>+</sup> co-expressing inputs (Figure 3H-I). Using this strategy, ~30% (31.5%; St. Dev. = ± 3.5, n=3  
243 animals) of all Homer puncta on NK1R cells were derived from CR<sup>+</sup> terminals, 4.2% (± 0.89) arising from  
244 CR<sup>+</sup> only inputs, and 27.3% (± 3.63) from CR<sup>+</sup>/SOM<sup>+</sup>. Alternatively, 50.4% (± 0.82) of all homer puncta on  
245 NK1R cells associated with a SOM<sup>+</sup> terminal, and of these 23.1% (± 2.93) were SOM<sup>+</sup> only, and 27.3%  
246 CR<sup>+</sup>/SOM<sup>+</sup>.

247 SOM labelling in axon terminals is punctate and does not delineate the entire axonal bouton. To ensure that  
248 all SOM inputs on to NK1R cells were captured, we used immunolabelling for VGLUT2 to outline  
249 individual excitatory axon terminals, and determined what proportion of these express SOM in WT mice  
250 (n=3 animals). In this analysis, we found that 68.9% (± 6.63) of all Homer puncta on NK1R-expressing  
251 dendrites associate with VGLUT2 terminals (Figure 3 J-L). This indicates that the principal source of  
252 excitatory input to PNs is derived from interneurons. Most of these VGLUT2-IR boutons co-expressed SOM  
253 (78.9% ± 6.28). Similarly, of all Homer puncta on NK1R-expressing dendrites, 59.4% (± 8.39) were apposed  
254 by SOM<sup>+</sup> boutons, of which most co-expressed VGLUT2 (91.7%; ± 1.96). This data shows that CR<sup>+</sup>  
255 neurons provide substantial monosynaptic excitatory input to LI NK1R<sup>+</sup> neurons, which largely represent  
256 PN's, with most of these terminals also expressing SOM<sup>+</sup>. Thus together, CR<sup>+</sup> and SOM<sup>+</sup> interneurons  
257 constitute more than half of the excitatory input to LI NK1R<sup>+</sup> neurons, and thus represent the principal  
258 source of excitatory input to these cells.

259 ***CR-ChR2 neurons provide strong, direct input to Projection neurons***

260 Given clear neuroanatomical evidence that CR<sup>+</sup> neurons provided input to LI projection neurons (PNs)  
261 above, the functional impact of these connections was assessed. CR<sup>cre</sup>;Ai32 animals (n=2) received bilateral  
262 intracranial injections of AAV-CB7-C1-mCherry in the parabrachial nuclei and then following a 3-4 week  
263 incubation period spinal cord slices were prepared for targeted recordings from mCherry-labelled PNs.  
264 Under these conditions, brief full-field photostimulation (16 mW, 1 ms) applied to activate CR-ChR2  
265 neurons produced oEPSCs in PNs that were blocked by bath applied CNQX (10  $\mu$ M, n = 5). oEPSCs were  
266 observed in 65% of these recordings (13/20) indicating clear connectivity between the CR-ChR2 population  
267 and PNs (Figure 4A). These responses could be differentiated into single oEPSC events (8/13) and multiple  
268 oEPSC responses (5/13). Consistent with some PNs receiving convergent input from several CR-ChR2  
269 neurons, multiple oEPSC responses exhibited slower rise times and half widths than single oEPSCs (rise =  
270  $9.66 \pm 2.95$  ms vs.  $2.97 \pm 0.45$  ms,  $p = 0.015$ ; halfwidth=  $15.73 \pm 2.16$  ms vs.  $7.76 \pm 1.39$  ms,  $p = 0.016$ ). In  
271 contrast, both oEPSC response types occurred at similar post-photostimulation latencies ( $8.21 \pm 2.2$  ms vs.  
272  $7.53 \pm 0.7$  ms,  $p = 0.82$ ) and together, these short latencies were comparable to those observed in other  
273 untargeted recordings dorsal to the CR<sup>+</sup> plexus and CR-ChR2 recordings ( $7.95 \pm 1.38$  ms vs.  $7.34 \pm 1.06$  ms,  
274  $p = 0.981$ ; and vs.  $8.61 \pm 1.23$  ms,  $p = 0.985$ , respectively). The strength of CR-ChR2 to PN connections was  
275 also assessed in current clamp where photostimulation-mediated oEPSPs were capable of evoking an action  
276 potential in ~70% of PNs (5/7), with a reliability of 0.675 (ie, 67.5% chance of a suprathreshold AP  
277 response). Neuroanatomical confirmation of direct CR-ChR2 derived input to PNs was also obtained in 3 of  
278 5 PNs that were neurobiotin recovered, where clear CR-ChR2 puncta were identified in close apposition to  
279 neurobiotin labelled dendrites (Figure 4B). Together, these results demonstrate a functionally relevant  
280 monosynaptic connection exists between CR-ChR2 neurons and PNs and is capable of recruiting PN  
281 discharge.

282 In light of this connectivity, the impact of repeated CR-ChR2 photostimulation was also assessed to  
283 determine if this pathway supported the enhanced signalling seen in the CR<sup>+</sup> network (see Figure 2). Under  
284 these conditions ~60% of PNs tested (5/8) exhibited significant and sustained responses during extended CR-  
285 ChR2 photostimulation (10 s @ 10 Hz, 10 ms pulses at 16 mW), defined as an increase in 4 standard  
286 deviations above the mean background sEPSC frequency (Figure 4C). This increase reflected the stimulation  
287 features (ie, approximately 10 Hz increase) and took ~20 s to return to baseline (Figure 4D). In contrast, the

288 remaining PNs still exhibited CR-ChR2 input but did not show sustained responses (3/8). In conclusion,  
289 these results confirm that strong signalling arising from the CR<sup>+</sup> network reaches PNs, the output cell of the  
290 DH, and therefore drive substantial output signals to higher brain regions in the ascending pain pathway.

### 291 ***Photostimulation in behaving CR-ChR2 mice***

292 The functional significance of CR-ChR2 neuron connectivity and activation within the DH was tested by  
293 chronically implanting a fiber optic probe over the surface of the dorsal spinal cord in CR<sup>cre</sup>;Ai32 mice for  
294 subsequent photostimulation. Behavioural responses were first tested using a range of photostimulation  
295 intensities (0.5 – 20 mW, 10 ms pulses @ 10 Hz for 10 s; Supplementary Figure 5), which produced clear  
296 behavioural responses (Supplementary Video 1). Specifically, responses were characterized by targeted  
297 nocifensive behaviour including paw lifting and licking/biting, typically focussed to the hindpaw or hindlimb  
298 region. The intensity and duration of these responses increased with photostimulation intensity until 10 mW  
299 and then stabilised above this (n=5, Supplementary Figure 5). Thus, a photostimulation intensity of 10 mW  
300 was adopted for subsequent experiments, unless otherwise noted. A larger cohort of CR<sup>cre</sup>;Ai32 (n=25)  
301 animals was then assessed, exhibiting nocifensive behaviour initiated at the onset of photostimulation (10  
302 mW, 10 ms pulses @ 10 Hz for 10 s) and outlasting the photostimulation period. (Figure 5A). In contrast,  
303 photostimulation in a cohort of fiber optic probe implanted CReGFP (n=9) animals did produce  
304 photostimulation time-locked behaviours, although random grooming bouts were occasionally observed  
305 (Figure 5A).

306 Given the sustained nature of post-photostimulation nocifensive responses, the potential for subsequent  
307 responses to be enhanced by prior CR-ChR2 activation was investigated by delivering two successive 10 s  
308 bouts of photostimulation, separated by 120 s (Figure 5B, n=9 animals). Under these conditions the second  
309 nocifensive response was significantly longer lasting than the first ( $56.26 \pm 10.09$  s vs.  $66.16 \pm 9.95$  s  
310  $p=0.005$ ; Figure 5B). This mirrored the observation that of some CR-ChR2 neurons received sustained levels  
311 of excitatory signalling for a period following recruitment *in vitro*, and this signal reach LI PNs. To further  
312 explore summation of CR-Ch2R<sup>+</sup> network activity, short trains of subthreshold photostimuli (no behavioural  
313 response to a single pulse) were delivered at two frequencies (0.1 and 0.5 Hz). Photostimulation intensities  
314 that did not evoke a behavioural response during 1 s of stimulation (10 ms pulses at 10 Hz) were first

315 established for each animal ( $n=6$ ,  $0.72 \pm 0.36$  mW, range 0.1-2 mW). This stimulus was then repeated once  
316 every 10 s over 1 min (0.1 Hz), and once every 2 s for 12 s (0.5Hz), altering the window for summation and  
317 associated behavioural responses without changing the total energy used to activate CR-ChR2 neurons  
318 (Figure 5C). These trains of stimuli reliably evoked behavioural responses at both frequencies (0.1 and 0.5  
319 Hz) despite the absence of responses to single stimuli. The response characteristics differed, however, in that  
320 the response latency for 0.1 Hz stimulation was significantly longer than for the higher frequency (0.5 Hz)  
321 protocol ( $11.83 \pm 2.41$  ms vs.  $2.00 \pm 0.82$  ms,  $p=0.012$ ). The relationship between stimulation frequency and  
322 total response was more varied with 5/6 animals exhibiting longer responses for the higher frequency  
323 stimulation (0.5 Hz) but response duration falling in one animal. Thus, response duration was statistically  
324 similar in both stimulation frequencies ( $20.57 \pm 6.31$  ms vs.  $28.73 \pm 1.86$  ms,  $p= 0.218$ ). This may be  
325 explained by the altered photostimulation frequency also changing the stimulation period duration and  
326 influencing the analysis. Regardless, these multiple stimulation paradigms reinforce the ability of CR<sup>+</sup>  
327 neuron networks to retain subthreshold and suprathreshold excitation within an integration window that can  
328 influence the characteristics of subsequent responses.

329 Another pronounced feature of the CR-ChR2 photostimulation response was the dynamic nature of the area  
330 targeted for nocifensive behaviour beyond the initial (primary) body region. This observation was  
331 characterized in a subset of animals ( $n=18$ ) where the initial response was directed at the right hind paw,  
332 allowing similar comparisons across multiple animals (Figure 5D). In this analysis, the onset of nocifensive  
333 responses directed to the right paw, right hind limb, back, and tail were measured, revealing a stereotypic  
334 progression of the nocifensive response across dermatomes. Comparison of the latency to nocifensive  
335 responses at each dermatome reinforced this stereotyped behaviour (right paw =  $1.25 \pm 0.22$  s vs. Right hind  
336 limb =  $26.42 \pm 9.11$  s vs. Back =  $40.83 \pm 10.78$  s vs. Tail =  $59.29 \pm 18.32$  s,  $p=0.003$ ; Figure 5D). Thus, in  
337 addition to sustaining excitation beyond photostimulation, optogenetic activation of the CR-ChR2<sup>+</sup> neuron  
338 network produced sensory signalling that spread to adjacent dermatomes before subsiding.

### 339 ***CR-ChR2 photostimulation responses are nociceptive and aversive***

340 Although CR-ChR2<sup>+</sup> photostimulation responses appeared nociceptive ‘pain-like’ in quality, additional  
341 analysis was needed to support this interpretation. First, Fos-protein activity mapping detected a distinct  
342 distribution of Fos<sup>+</sup> neurons in the brains of CR<sup>cre</sup>;Ai32 ( $n=5$ ) versus CReGFP ( $n=5$ ) mice following a single

343 bout of spinal photostimulation (10 mW 10 ms pulses @ 10 Hz for 10 s). Specifically, robust Fos<sup>+</sup>  
344 expression was detected in the somatosensory cortex (S1), cingulate cortex, insular cortex, and parabrachial  
345 nucleus (PBN) of CR<sup>cre</sup>;Ai32 mice (Figure 6A). This expression pattern was significantly elevated above the  
346 CREGFP control group (S1 p=0.043, cingulate p=0.016, insula p=0.035, and PBN p=0.023). Neuronal  
347 activity in these regions is consistent with nociceptive signalling being relayed along the neuroaxis,  
348 mirroring the pronounced nocifensive responses observed during *in vivo* photostimulation.

349 Given nocifensive responses should also be sensitive to analgesia, a group of CR<sup>cre</sup>;Ai32 animals (n=5) also  
350 underwent photostimulation during a randomized schedule of varying degrees of morphine analgesia  
351 (3mg/kg, 10mg/kg, or 30mg/kg morphine s.c; or vehicle only injection of saline, s.c.). Identical  
352 photostimulation was delivered under each condition (10 mW, 10 ms pulses @ 10 Hz for 10 s) and  
353 behavioural responses analysed to provide a robust assessment of analgesic sensitivity (Figure 6B).  
354 Morphine produced a dose dependent reduction in the photostimulation-induced nocifensive behaviour,  
355 which was abolished at the highest morphine dose (30mg/kg). This reinforces the nocifensive nature of the  
356 circuits activated during CR-ChR2<sup>+</sup> photostimulation.

357 While the above data shows CR-ChR2<sup>+</sup> photostimulation was sufficient to evoke responses consistent with  
358 nociceptive pain, this did not confirm necessity of the CR<sup>+</sup> network in sensory-evoked responses. Thus, a  
359 photoinhibition approach was also employed crossing CR-cre mice with loxP-flanked-NpHR3eYFP mice  
360 (Ai39) to generate offspring where halorhodopsin (NpHR3) was expressed in CR<sup>+</sup> neurons (CR<sup>cre</sup>;Ai39). To  
361 validate the expression of NpHR3-YFP expression in CR cells, we assessed the incidence of co-expression  
362 of these markers in spinal neurons in laminae I and II (n = 3 animals). We found that 82.2% ( $\pm$  1.27) of YFP-  
363 expressing cells were immunopositive for CR (967 YFP cells analysed; range 281, 316 and 370 cells per  
364 animal; Supplementary Figure 6A), and that 94.1% ( $\pm$  4.27) of CR-IR cells expressed YFP (225 CR-IR cells  
365 analysed; 58, 78 and 89 cells per animal). Furthermore, full field illumination (590 nm, 20 mW) evoked  
366 prominent outward currents consistent with a NpHR3-mediated potassium conductance (Supplementary  
367 Figure 6B). NpHR3-mediated photoinhibition of AP discharge was confirmed by comparing CR-NpHR3<sup>+</sup>  
368 neuron spiking responses to depolarizing current injection with and without photoinhibition (Supplementary  
369 Figure 6C). Under these conditions photoinhibition increased the rheobase current required to activate AP  
370 spiking and decreased the number of APs evoked during increasing current steps (Supplementary Figure

371 6C). CR;Ai39 mice (n=8) were subsequently implanted with spinal fiber optic probes and underwent von  
372 Frey mechanical threshold testing with and without NpHR3-mediated photoinhibition (590 nM, 20 mW) in  
373 alternating order over 4 days (Figure 6C). *In vivo* photoinhibition significantly reduced paw withdrawal  
374 threshold on the ipsilateral (photoinhibited) hind paw ( $0.19 \pm 0.02$  g vs.  $0.29 \pm 0.04$  g,  $p=0.017$ ) but not  
375 contralateral side ( $0.18 \pm 0.02$  g vs.  $0.19 \pm 0.03$  g,  $p=0.721$ ), confirming a role for the CR<sup>+</sup> network in setting  
376 withdrawal thresholds (Figure 6C).

377 Finally, the relative potency and valence of spinal photostimulation was assessed in a group of CR<sup>cre</sup>;Ai32  
378 animals (n=13) with spinal fiber optic probes implanted that subsequently underwent conditioned place  
379 aversion testing (Figure 6D). Baseline preference for each animal was determined in a two-arena enclosure  
380 without photostimulation, and the preferred arena was then assigned for photostimulation (10 mW 10 ms  
381 pulses @ 10 Hz for 10 s in every min). Animals were subsequently tested for a real-time place aversion (RT-  
382 PA) over 4 sessions, i.e. learned avoidance of the photostimulation arena (Supplementary Video 2). Animals  
383 that exhibited a strong RT-PA on the last two sessions, defined as a 50% reduction from baseline in time  
384 spent in photostimulation area, were subsequently tested for a traditional conditioned place aversion (CPA) 1  
385 h (short term) and 24 h (long term) after the last RT-PA session (9/13 animals). Importantly, no  
386 photostimulation was delivered during this CPA testing, instead assessing the aversive nature of  
387 photostimulation recall. In short term CPA testing (ST-CPA), animals retained a significant aversion to the  
388 previous photostimulation arena compared to baseline ( $363 \pm 15$  s vs.  $72 \pm 25$  s,  $p=0.0001$ ). Likewise, in  
389 long term CPA testing (LT-CPA) aversion to the previous photostimulation arena was still apparent 24 h  
390 after RT-PA ( $363 \pm 15$  s vs.  $89 \pm 31$  s,  $p=0.0001$ ). Thus, spinal photostimulation of the CR-ChR2<sup>+</sup> population  
391 produced a potent sensory experience with a strong and lasting negative valence.



392

## Discussion

393 Our limited understanding of sensory coding in the spinal cord remains a significant barrier to defining how  
394 normal sensory experience evolves and how pathological conditions such as chronic pain develop (Todd,  
395 2010, Hachisuka et al., 2018). In this study we applied both *in vitro* and *in vivo* optogenetic approaches and  
396 show that a specific population of DH interneurons that express CR form a highly interconnected excitatory  
397 network that is capable of driving excitation in multiple postsynaptic DH neuron populations, including  
398 direct connections to projection neurons. Excitation of this microcircuitry outlasts initial CR<sup>+</sup> neuron  
399 activation, indicating the CR<sup>+</sup> network of reciprocal excitatory connections has the capacity to sustain  
400 synaptic activity. Extending these *in vitro* findings, optogenetic activation of the CR<sup>+</sup> population in awake  
401 animals caused a profound and multifaceted nocifensive response, indicating that this network can prolong,  
402 spread and amplify spinal nociceptive signaling. Together, these findings provide a detailed examination of  
403 the CR<sup>+</sup> excitatory interneuron population and the postsynaptic circuits they activate during sensory  
404 processing.

### 405 ***CR<sup>+</sup> neuron microcircuits***

406 Our *in vitro* electrophysiology showed that CR<sup>+</sup> neurons exhibit diverse functional excitatory synaptic  
407 connections within the DH. A surprising finding in this work was the high degree of interconnectivity  
408 between CR<sup>+</sup> neurons, establishing an excitatory network that when recruited, could substantially enhance  
409 excitation in the DH (Figure 1 and 2). This is in line with observations using viral-mediated excitatory  
410 DREADD-expression to activate CR<sup>+</sup> neurons selectively (Peirs et al., 2015). This work showed that CNO  
411 exposure activated a substantial proportion of transduced DREADD-positive CR<sup>+</sup> neurons (30%), however,  
412 an additional large proportion of DREADD-negative CR<sup>+</sup> neurons (45%) were also activated. This supports  
413 the capacity of CR<sup>+</sup> neuron recruitment to drive activation of the wider CR<sup>+</sup> network. Such interconnectivity  
414 in a neurochemically defined population has been described for another DH population identified by  
415 expression of neurotensin (Hachisuka et al., 2018), although this work did not go on to demonstrate the  
416 functional relevance of this observation in behaving animals. Nevertheless, this work highlighted how  
417 interconnected excitatory networks could potentiate excitatory DH signaling. Likewise, similar arrangements  
418 of interconnected neuronal networks have been reported in other CNS regions, albeit typically involving  
419 inhibitory populations (Tamas et al., 2000, Woodruff and Sah, 2007, Meyer et al., 2002). This

420 interconnectivity among excitatory interneurons suggests the CR<sup>+</sup> network represents a potent source of  
421 excitatory signaling, that could amplify input in the DH.  
422  
423 CRACM experiments also showed that input from CR<sup>+</sup> neurons is widespread, with other neurons located in  
424 the CR<sup>+</sup> plexus as well as more dorsal populations, receiving short and longer latency input following CR-  
425 ChR2 activation. These experiments also confirmed that one of the dorsal populations to receive this input  
426 was LI projection neurons, which often received convergent, multicomponent inputs and more reliably  
427 discharged APs in response to this input than other populations. A slower time course in these projection  
428 neuron responses also suggests summation of several asynchronous inputs through multiple pathways. These  
429 features are consistent with CR<sup>+</sup> neurons initiating excitation that converges on projection neurons. Such  
430 excitatory relays have been proposed in the DH as a substrate for allodynia, where low threshold mechanical  
431 inputs are transmitted into nociceptive circuits (Peirs et al., 2015, Torsney and MacDermott, 2006,  
432 Miraucourt et al., 2007, Neumann et al., 2008), as well as feed forward circuits that supplement excitation  
433 during nociceptive processing (Lu et al., 2013, Lu and Perl, 2005). For example, Peirs et al., (2015) showed  
434 that CR<sup>+</sup> neurons receive low-threshold input via a population of lamina III neurons that transiently express  
435 VGLUT3. They also used Fos labelling and DREADD silencing of various populations to propose a circuit  
436 connecting CR<sup>+</sup> neurons to projection neurons in lamina I via polysynaptic connections that included an  
437 interposed population of SOM<sup>+</sup> interneurons. In support of this proposal, we find approximately 30% of all  
438 excitatory input to lamina I projection neurons are derived from axons of CR<sup>+</sup> interneurons (Figure 3), of  
439 which a significant proportion also express SOM (86.5%; ± 3.17). These findings demonstrate that CR<sup>+</sup>  
440 neurons provide considerable direct input to the lamina I projection neuron population, and when considered  
441 alongside the CR<sup>+</sup> network interconnectivity, these have the potential to greatly influence spinal sensory  
442 outputs. Distinctions in these predicted circuits (monosynaptic from CR<sup>+</sup> neurons versus polysynaptic via  
443 SOM<sup>+</sup> neurons) may reflect methodological differences, with the Peirs work using a viral strategy that  
444 identified a relatively narrow population of CR<sup>+</sup> neurons, whereas our experiments used a transgenic  
445 breeding approach identifying a much larger CR<sup>+</sup> population. In agreement with Peirs et al (2015), however,  
446 our dataset suggests excitatory SOM<sup>+</sup> and projection neurons are postsynaptic to the CR<sup>+</sup> population, but not  
447 PKCγ<sup>+</sup> excitatory interneurons (Figure 3). Importantly, the high fidelity of YFP expression with CR  
448 immunolabelling in our mouse lines validates that our behavioral observations and circuit diagrams are the

449 result of manipulating CR-expressing cells, and not contaminated by populations of unidentified neurons that  
450 express CR<sup>+</sup> transiently during earlier developmental time-points. In summary, the interconnectivity of CR<sup>+</sup>  
451 neurons, combined with the postsynaptic circuitry we have identified provides a mechanism to relay low  
452 threshold input into nociceptive circuits (allodynia), and provide additional excitation during nociceptive  
453 processing (hyperalgesia) through reverberating patterns of excitation.

454

455 Inhibitory signaling has been a central element in models of spinal sensory processing since publication of  
456 the gate control theory and contemporary work from a number of groups has since identified several critical  
457 inhibitory populations (Petitjean et al., 2015, Duan et al., 2014, Foster et al., 2015, Cui et al., 2016).  
458 Consistent with these views, our Fos mapping also supports a role for the CR<sup>+</sup> network in engaging  
459 inhibitory interneurons. These inhibitory circuits may be important for modality coding by suppressing  
460 selective populations while the CR<sup>+</sup> circuits are active (Zeilhofer et al., 2012, Price and Prescott, 2015). Such  
461 inhibition is known to act in other sensory systems to refine receptive field characteristics and a similar  
462 constraint over the activation of CR<sup>+</sup> neurons would fit such a model (Woolf and Fitzgerald, 1983, Kato et  
463 al., 2011). Finally, ongoing inhibition can tune sensory thresholds, most evident in the wealth of data  
464 showing that diminished inhibition leads to pathological conditions such as chronic pain and itch (Moore et  
465 al., 2002, Coull et al., 2003, Zeilhofer, 2005, Ross et al., 2010). An important distinction between the current  
466 study and previous work is that the inhibition evoked in our study is driven exclusively by recruitment of  
467 CR<sup>+</sup> spinal interneurons, rather than as a result of primary afferent drive. Thus, the CR<sup>+</sup> related microcircuits  
468 appear to have an inbuilt mechanism to limit the outcome of their activity under control conditions. By  
469 extension, any reduction to this inhibition would unmask added excitation with DH circuits with relevance to  
470 many pathological conditions that feature aberrant excitation. We show that CR<sup>+</sup> network evoked inhibition  
471 is widespread in the DH, with a range of latencies that indicate both direct and indirect circuits are engaged  
472 (Supplementary Figure 4). Direct inhibition is not surprising given we have previously described a small  
473 inhibitory CR<sup>+</sup> population (Smith et al., 2015), and show here that they express ChR2 in the CR<sup>cre</sup>;Ai32  
474 animals used. These neurons are directly activated during spinal photostimulation and therefore provide the  
475 only source of short latency monosynaptic inhibition. In contrast, secondary recruitment of other inhibitory  
476 populations by the excitatory CR<sup>+</sup> neurons produces longer latency polysynaptic inhibition. Previous work  
477 has shown dynorphin<sup>+</sup> neurons provide important gating inhibition to somatostatin<sup>+</sup> neurons (Duan et al.,

478 2014), and given the overlap between somatostatin and CR, CR/SOM cells are therefore also likely to  
479 contribute to the polysynaptic inhibition observed here. Similarly, GABAergic enkephalin<sup>+</sup> neurons have  
480 recently been implicated in gating mechanical pain (Francois et al., 2017) and thus may also contribute to  
481 CR<sup>+</sup> network evoked inhibition.

482

### 483 ***Behavioral consequence of CR-ChR2 activation***

484 The behavioral consequence of experimentally activating CR<sup>+</sup> circuits *in vivo* was striking, with a targeted  
485 and multifaceted nocifensive response (paw licking, biting, shaking) directed to dermatomes predicted by the  
486 location of fiber optic implant and initiated upon photostimulation (Supplementary Figure 5). This resembles  
487 reports from two other groups that have applied spinal photostimulation to populations of DH neurons. The  
488 most relevant assessed excitatory somatostatin<sup>+</sup> neurons, reporting photostimulation produced abrupt  
489 nocifensive behavior and a conditioned place aversion (Christensen et al., 2016). This conserved behavioral  
490 profile is again consistent with the overlap in somatostatin and CR populations studied and the postsynaptic  
491 position of somatostatin<sup>+</sup> neurons relative to the CR<sup>+</sup> population. The Christensen et al (2016) study,  
492 however, also unmasked an itch related behavior using modified photostimulation parameters. We confirmed  
493 the nociceptive nature of CR<sup>+</sup> photostimulation by demonstrating selective Fos labelling in distinct pain  
494 processing brain nuclei as well as sensitivity of the behavioral responses to morphine (Figure 6). We  
495 observed a dose dependent inhibition of photostimulation related behavior that was abolished at the highest  
496 morphine dose. Importantly, morphine is a prototypical analgesic but does not have antipruritic actions, in  
497 fact it induces scratching when administered intrathecally, independent of analgesia (Lui and Ng, 2011).  
498 Thus, coupled with the robust neuronal activation we report in key regions in the ascending pain pathway  
499 (Figure 6), this work reinforces CR<sup>+</sup> activated pathways are nociceptive in quality.

500

501 It is worth noting that a small number of inhibitory CR<sup>+</sup> neurons were also activated during photostimulation  
502 (Figure 3G). Previous optogenetic manipulation of inhibitory populations in the DH has only been reported  
503 using archaerhodopsin, which produced a predictable decrease in sensory thresholds (Bonin et al., 2016). The  
504 related approach of chemogenetic activation has, however, been applied to activate parvalbumin<sup>+</sup> inhibitory  
505 interneurons in the DH, demonstrating an increase in sensory thresholds as well as an attenuation of nerve  
506 injury induced allodynia (Petitjean et al., 2015). Taken together, these results support the well-established

507 role of inhibitory populations in suppressing spinal nociceptive signaling and suggest the recruitment of  
508 some inhibitory CR<sup>+</sup> neurons in our experiments will have had minimal effects on the robust behavioral  
509 outcomes attributed to the excitatory CR<sup>+</sup> population. Furthermore, we show that halorhodopsin-mediated  
510 inhibition of the CR<sup>+</sup> population increased mechanical withdrawal thresholds, consistent with the result that  
511 would be predicted for inactivation of an inhibitory population from the above work.

512 Three behavioral observations during CR<sup>+</sup> neuron photostimulation warrant further discussion. First,  
513 behavioral responses persisted well beyond the termination of photostimulation (Figure 5, Supplementary  
514 Figure 5). Coupled with the interconnectivity of CR<sup>+</sup> neurons and the sustained increase in spontaneous  
515 excitatory activity under extended *in vitro* photostimulation conditions, this indicates signaling can be  
516 maintained by this excitatory network. Second, behavioral responses to repeated photostimulation were  
517 enhanced, indicating short-term plasticity within the CR<sup>+</sup> network (Figure 5). Previous work has focused  
518 largely on plasticity between primary afferents and DH populations (Baba et al., 2001, Luo et al., 2014),  
519 whereas our findings extend our understanding to show plasticity also occurs within intrinsic DH circuits.  
520 Finally, photostimulation responses showed a predictable pattern that initially saw nocifensive behavior  
521 focused on a specific body region (commonly the paw) but then progressed over a number of adjacent  
522 dermatomes (Figure 5). This, coupled with spinal Fos activation patterns, which extended over the  
523 mediolateral extent of the DH (Figure 3), suggest the excitatory CR<sup>+</sup> network provides a pathway to spread  
524 excitation across normal dermatome boundaries. Together, these observations extend on the current view of  
525 excitatory interneurons in spinal sensory processing, which ascribes a relative limited role of linking low  
526 threshold modality (innocuous) tactile input to excite more dorsal nociceptive circuitry (Peirs and Seal, 2016,  
527 Duan et al., 2014, Yu et al., 2017). We suggest these neurons also provide a polysynaptic network to  
528 enhance/amplify local excitation, prime the region for subsequent responses, and spread excitatory signaling  
529 across modality borders.

530

### 531 **Conclusions**

532 The results from this study confirm that CR<sup>+</sup> neurons form an excitatory DH network that contributes to  
533 spinal pain signaling and can amplify pain signals in the absence of peripheral input. The strong  
534 interconnectivity of this neurochemically-defined subpopulation in the DH means they are ideally positioned

535 to alter incoming sensory information prior to its relay to higher brain centers. This capacity is clearly  
536 demonstrated in the nocifensive responses elicited by spinal photostimulation. Importantly, however, our  
537 work has largely focused on characterizing CR<sup>+</sup> microcircuits and establishing their functional roles in  
538 sensory experience by experimental activation using optogenetics. Future work must continue to determine  
539 how these circuits respond during peripherally evoked sensory processing, as we have here using  
540 halorhodopsin. Furthermore, the question of how pathology and injury can recruit or alter CR<sup>+</sup> circuits will  
541 also be critical for determining how they contribute to symptoms of pathological pain, and how best to target  
542 them for therapeutic benefit.

## 543 **Experimental Procedures**

### 544 *Animals and Ethics*

545 Optogenetic studies were carried out on mice derived by crossing Calb2-IRES-cre (Jackson Laboratories,  
546 Bar Harbor, USA; #010774) with either Ai32 (Jackson Laboratories, Bar Harbor, USA; #024109) or Ai39  
547 (Jackson Laboratories, Bar Harbor, USA, #014539) to generate offspring where ChR2/YFP or NpHR/YFP  
548 was expressed in CR<sup>+</sup> cells (CR<sup>cre</sup>;Ai32 or CR<sup>cre</sup>;Ai39). Axon terminal labelling experiments crossed Calb2-  
549 IRES-cre and Ai34D (Jackson Laboratories, Bar Harbour, USA, # 012570) mice to generate offspring with  
550 CR<sup>+</sup> axon terminals labelled with TdTomato. In control experiments, another transgenic mouse line with  
551 enhanced green fluorescent protein expressed under the control of the calretinin promoter (CReGFP) was  
552 used (Caputi et al., 2009). All experimental procedures were performed in accordance with the University of  
553 Newcastle's animal care and ethics committee (protocols A-2013-312 and A-2016-603). Animals of both  
554 sexes were used for electrophysiology (age: 3-12 months) and behavior experiments (age: 8-12 weeks).

### 555 *Spinal slice preparation*

556 Acute spinal cord slices were prepared using previously described methods (Graham et al., 2003, Graham et  
557 al., 2011). Briefly, animals were anaesthetized with ketamine (100mg/kg i.p) and decapitated. The ventral  
558 surface of the vertebral column was exposed and the spinal cord rapidly dissected in ice-cold sucrose  
559 substituted cerebrospinal fluid (ACSF) containing (in mM): 250 sucrose, 25 NaHCO<sub>3</sub>, 10 glucose, 2.5 KCl, 1  
560 NaH<sub>2</sub>PO<sub>4</sub>, 1 MgCl and 2.5 CaCl<sub>2</sub>. Either parasagittal or transverse slices were prepared (L1-L5, 200µm  
561 thick: LI-L5 300µm thick, respectively) both using a vibrating microtome (Campden Instruments 7000 smz,  
562 Loughborough, UK). Targeted CR<sup>+</sup> and unidentified recordings were undertaken in parasagittal slices,  
563 whereas targeted PN recordings used slices in the transverse plane. Slices were transferred to an interface  
564 incubation chamber containing oxygenated ACSF (118mM NaCl substituted for sucrose) and allowed to  
565 equilibrate at room temperature for at least one hour prior to recording.

### 566 *Patch clamp electrophysiology*

567 Following incubation, slices were transferred to a recording chamber and continuously superfused with  
568 ACSF bubbled with carbanox (95% O<sub>2</sub>, 5% CO<sub>2</sub>) to achieve a final pH of 7.3-7.4. All recordings were made  
569 at room temperature. Neurons were visualised using a 40x objective and near-IR differential interference

570 contrast optics. To identify CR-ChR2/CR-NpHR<sup>+</sup> neurons, which expressed YFP, slices were viewed under  
571 fluorescence using a FITC filter set (488nm excitation and 508nm emission). CR<sup>+</sup> neurons were concentrated  
572 within LII of the DH, described previously (Smith et al., 2015, Smith et al., 2016), and is easily identified as  
573 a plexus of YFP fibers and soma under fluorescent microscopy. All recordings were made either within or  
574 dorsal to this CR<sup>+</sup> plexus. The parasagittal slicing approach allowed easy differentiation of the two CR  
575 populations we have previously described (Smith et al., 2015, Smith et al., 2016). Specifically, the CR<sup>+</sup>  
576 excitatory population exhibits a restricted dendritic profile, whereas less common inhibitory CR<sup>+</sup> neurons  
577 possess extensive rostro-caudal projecting dendritic arbours. Patch pipettes (4-8 MΩ) were filled with either  
578 a potassium gluconate based internal for recordings of excitatory input and action potential (AP) discharge,  
579 containing (in mM): 135 C<sub>6</sub>H<sub>11</sub>KO<sub>7</sub>, 6 NaCl, 2 MgCl<sub>2</sub>, 10 HEPES, 0.1 EGTA, 2 MgATP, 0.3 NaGTP, pH 7.3  
580 (with KOH); or a caesium chloride-based internal solution for inhibitory input recordings, containing (in  
581 mM): 130 CsCl, 10 HEPES, 10 EGTA, 1 MgCl<sub>2</sub>, 2 MgATP and 0.3 NaGTP, pH 7.35 (with CsOH).  
582 Neurobiotin (0.2%) was included in all internal solutions for *post-hoc* cell morphology. All data were  
583 acquired using a Multiclamp 700B amplifier (Molecular Devices, Sunnyvale, CA, USA), digitized online  
584 (sampled at 10-20 kHz, filtered at 5-10 kHz) using an ITC-18 computer interface (Instrutech, Long Island,  
585 NY, USA) and stored using Axograph X software (Molecular Devices, Sunnyvale, CA, USA).  
586 AP discharge patterns were assessed in current clamp from a membrane potential of ~ -60mV by delivering a  
587 series of depolarising current steps (1 s duration, 20 pA increments). AP discharge was classified using  
588 previously described criteria (Graham et al., 2004, Graham et al., 2007). Briefly, delayed firing (DF) neurons  
589 exhibited a clear interval between current injection and the onset of the first AP; tonic firing (TF) neurons  
590 exhibited continuous repetitive AP discharge for the duration of the current injection; initial bursting (IB)  
591 neurons were characterised by a burst of AP discharge at the onset of the current injection; and single spiking  
592 (SS) neurons only fired a single AP at the beginning of the current step. Input resistance and series resistance  
593 were monitored throughout all recordings and excluded if either of these values changed by more than 10%.  
594 No adjustments were made for liquid junction potential. The subthreshold currents underlying AP discharge  
595 were assessed using a voltage-clamp protocol that delivered a hyperpolarizing step to -100 mV (1 s duration)  
596 followed by a depolarizing step to -40 mV (200 ms duration) from a holding potential of -70 mV. This  
597 protocol identifies four major ionic currents previously described in DH neurons, including the outward



598 potassium currents (rapid and slow  $I_A$ ) and the inward currents, T-type calcium and non-specific cationic  
599 current  $I_h$ .

### 600 *In vitro optogenetics*

601 Photostimulation was achieved using a high intensity LED light source (CoolLED pE-2, Andover, UK)  
602 delivered through the microscopes optical path and controlled by Axograph X software. Recordings from  
603 excitatory versus inhibitory CR-ChR2 neurons were distinguished using their morphology in the parasagittal  
604 slice and distinct electrophysiological profiles (Smith et al., 2015, Smith et al., 2016). Photocurrents were  
605 first characterised in CR-ChR2 neurons using a current versus light intensity (488 nm, 1 second duration)  
606 analysis in voltage clamp mode. Combinations of neutral density filters were used to reduce  
607 photostimulation intensity (0.039 – 16 mW). To assess the ability and reliability of photostimulation to  
608 evoke AP discharge in CR-ChR2<sup>+</sup> neurons the recording mode was switched to current clamp and brief  
609 photostimuli (16 mW, 1 ms) were delivered at multiple frequencies 5Hz, 10Hz and 20Hz (1 s duration). We  
610 then used channelrhodopsin-2 assisted circuit mapping (CRACM) to characterise the connectivity of CR<sup>+</sup>  
611 neurons within the DH. The postsynaptic circuits receiving input from CR-ChR2<sup>+</sup> neurons were  
612 characterized by delivering photostimulation (16 mW, 1 ms) every 12 seconds during patch clamp  
613 recordings and assessing current responses for photostimulation associated synaptic input. These recordings  
614 were made from CR-ChR2<sup>+</sup> neurons as well as 3 populations of CR-ChR2 negative neurons (i.e. those that  
615 did not exhibit YFP expression). These DH neuron populations were classified relative to the distinct CR<sup>+</sup>  
616 plexus within LII as either: 1) Plexus - within the CR<sup>+</sup> plexus; 2) Dorsal - dorsal to CR<sup>+</sup> plexus; or 3)  
617 Projection neurons - dorsal to the CR<sup>+</sup> plexus and retrograde labelled (see below). The response of these  
618 populations was also assessed during prolonged photostimulation using two stimulus paradigms: 1) a 2  
619 second continuous photostimulation (16 mW); and 2) a 1 second photostimulation (16 mW, 1 ms pulses @  
620 10 Hz for 1 s).

### 621 *Projection neuron recordings*

622 To identify Lamina I projection neurons in slice recording experiments a subset of animals (n=2) underwent  
623 surgery to inject a viral tracer, specifically AAV-CB7-C1~mCherry, into the parabrachial nucleus (PBN).  
624 Retrograde transport of virus particles, incorporation into the genome and the subsequent expression of the

625 mCherry protein within the PNs allowed this population to be targeted for patch clamp recording. Briefly,  
626 mice were anaesthetised with isoflurane (5% induction, 1.5-2% maintenance) and secured in a stereotaxic  
627 frame (Harvard Apparatus, Massachusetts, U.S.A). A small craniotomy was performed and up to 700nL of  
628 the viral sample was injected using a picospritzer (PV820, WPI, Florida, USA) into the PBN bilaterally.  
629 These injections were made 5.25mm posterior to bregma,  $\pm$  1.2mm of midline and 3.8mm deep from skull  
630 surface, using coordinates refined from those in the mouse brain atlas (Paxinos and Franklin, 2001).  
631 Injections were made over 5 minutes and the pipette left in place for a further 7-10 minutes to avoid drawing  
632 the virus sample along the pipette track. Animals were allowed to recover for 3 weeks to allow sufficient  
633 retrograde labelling of projection neurons before spinal cord slices were prepared. CRACM was then  
634 performed as above for other DH populations. The brain from each animal was also isolated and brainstem  
635 slices containing the PBN were prepared to confirm the injection site, which was appropriately focussed on  
636 PBN in all cases. Spinal cord slices were obtained using methods described above (*spinal slice preparation*)  
637 and mCherry positive neurons were visualised for recording using a Texas Red filter set (549 excitation, 565  
638 emission).

### 639 *Patch clamp data analysis*

640 All electrophysiology data were analysed offline using Axograph X software. ChR2 photocurrent amplitudes  
641 were measured as the difference between baseline and the steady state portion of the photocurrent. Excitatory  
642 and inhibitory photostimulation-evoked synaptic currents elicited by brief photostimulation, hereafter termed  
643 optical postsynaptic currents (oEPSCs and oIPSCs), were captured episodically and averaged (10 trials).  
644 Peak amplitude, rise time (10-90% of peak) and decay time constant (10-90% of the decay phase) were  
645 measured from average oEPSCs and oIPSCs. Response latency was also measured on averaged records, as  
646 the time between the onset of photostimulation and onset of the oEPSC/oIPSC. In photostimulation  
647 responses that contained multiple components a semi-automated peak detection procedure was used to  
648 determine the latency of all responses. To differentiate direct (monosynaptic) input from indirect  
649 (polysynaptic) response components the photostimulation recruitment time for CR-ChR2<sup>+</sup> neurons was  
650 determined as the latency between the onset of photostimulation and the onset of AP discharge. In addition,  
651 the average time between spiking in a presynaptic neurons and a monosynaptic response in synaptically  
652 connected neurons was taken from previous paired recording studies in the spinal DH (Santos et al., 2007,

653 Lu and Perl, 2003, Lu and Perl, 2005). These data account for the combination of AP conduction and  
654 synaptic delay that takes ~2.5ms. Thus, windows were set for oEPSCs and oIPSCs to be considered  
655 monosynaptic by adding the photostimulation recruitment time, conduction and synaptic delays ( $\pm 2$  standard  
656 deviations) of photostimulation recruitment time. Responses outside these windows were considered to more  
657 likely arise from polysynaptic activity. For longer photostimulation paradigms both oEPSCs and  
658 spontaneous excitatory postsynaptic currents (sEPSCs) were detected using a sliding template method (a  
659 semi-automated procedure in the Axograph package). Average oEPSC/sEPSCs frequency was calculated  
660 over 100ms epochs by multiplying the number of events in each epoch by 10.

661 To isolate oEPSCs and oIPSCs in CR-ChR2<sup>+</sup> neurons, the photocurrents were first subtracted using a  
662 pharmacological approach. For oEPSCs (K<sup>+</sup> gluconate-based internal), photocurrents were isolated following  
663 application of CNQX (10  $\mu$ M) and then scaled to the peak photocurrent before drug application. The isolated  
664 photocurrent was then subtracted from the pre-CNQX traces leaving the isolated synaptic response  
665 (Supplementary Figure 3). The same procedure was repeated for oIPSCs (CsCl-based internal solution),  
666 except responses were obtained under 3 conditions following sequential application of CNQX (10  $\mu$ M),  
667 bicuculline (10  $\mu$ M), and strychnine (1  $\mu$ M). In this case, the isolated photocurrent (recorded in CNQX,  
668 bicuculline and strychnine) was subtracted from the photostimulation responses under each drug condition.

### 669 *Optogenetic stimulation for Fos activation mapping*

670 The postsynaptic circuits targeted by CR<sup>+</sup> neurons were assessed by delivering spinal photostimulation to  
671 anaesthetised CR<sup>cre</sup>;Ai32 animals (and CReGFP control animals) and then processing spinal cords for Fos-  
672 protein and a range of additional neurochemical markers. Animals (n=5) were anaesthetised with isoflurane  
673 (5% initial, 1.5-2% maintenance) and secured in a stereotaxic frame. A longitudinal incision was made over  
674 the T10-L1 vertebrae and a laminectomy was performed on the T13 vertebra. Unilateral photostimulation  
675 (10 mW, 10 ms pulses @ 10 Hz for 10 min) was then delivered to the exposed spinal cord by positioning an  
676 optic fiber probe (400 nm core, 1 mm fiber length, Thor Labs, New Jersey, U.S.A) above the spinal cord  
677 surface using the stereotaxic frame. Photostimulation was delivered by a high intensity LED light source  
678 attached to the probe via a patch cord. Following photostimulation animals remained under anaesthesia for a  
679 further 2 hrs for subsequent comparison of Fos expression in neurochemically defined DH neurons. Animals  
680 were then anaesthetised with ketamine (100 mg/kg i.p) and perfused transcardially with saline followed by

681 4% depolymerised formaldehyde in 0.1M phosphate buffer. Sections were processed for  
682 immunocytochemistry by incubating in a cocktail of antibodies including chicken anti-GFP and goat anti-  
683 cFos, with either rabbit anti-NK1R, rabbit anti-somatostatin, rabbit anti-PKC $\gamma$  or rabbit anti-Pax2. Full  
684 details of primary antibodies are provided in Table 1. Primary antibody labelling was detected using species-  
685 specific secondary antibodies conjugated to rhodamine, Alexa 488, Alexa 647 (Jackson Immunoresearch,  
686 West Grove, PA, USA). or with NK1-immunolabelling was visualised using a biotinylated anti-rabbit  
687 antibody (Jackson Immunoresearch) followed by a Tyramide signal amplification step using a  
688 tetramethylrhodamine kit (PerkinElmer Life Sciences, Boston, MA, USA), as described previously (Hughes  
689 et al., 2013).

### 690 *Transgenic axon terminal labelling*

691 Analysis of CR<sup>+</sup> neuron input to putative projection neurons was undertaken in tissue from CR<sup>cre</sup>;Ai34 mice  
692 that selectively labelled CR<sup>+</sup> axon terminals with tdTomato. Animals were anaesthetised with sodium  
693 pentobarbitone (30 mg/kg *i.p.*) and perfused transcardially with Ringer solution followed by 4%  
694 depolymerised formaldehyde in 0.1M phosphate buffer. Sections were processed for immunohistochemistry  
695 by incubating in cocktails of antibodies including chicken anti-GFP, goat anti-calretinin, goat anti-Homer1,  
696 rat anti-mCherry, rabbit anti-NK1R, guinea pig anti-somatostatin, and mouse anti-VGLUT2. For full details  
697 of these antibodies, see Table 2. Primary antibody labelling was detected using species-specific secondary  
698 antibodies conjugated to rhodamine, Alexa 488, Alexa 647 (Jackson Immunoresearch, West Grove, PA,  
699 USA).

### 700 *Calretinin inputs onto filled Projection Neurons*

701 As noted above, 0.2% neurobiotin was included in all internal recording solutions to recover recorded cell  
702 morphology. In the AAV-mediated targeted recordings of LI projection neurons, the cells were recovered  
703 using a streptavidin~Cy5 secondary antibody before initial imaging ( $z=1\mu\text{m}$ , scan speed 400, pinhole 1AU)  
704 using a water immersion 25x objective on a Leica TCS SP8 scanning confocal microscope equipped with  
705 Argon (458, 488, 514nm), DPSS (561nm) and HeNe (633) lasers. Slices that contained recovered PNs were  
706 reacted with chicken anti-GFP (see Table 2 for details), to resolve axon boutons of CR neurons in close  
707 apposition with labelled PNs. Spinal slices were re-sectioned to 50 $\mu\text{m}$  thickness, mounted in glycerol and

708 imaged using both a 40x oil and 63x water immersion objective. Boutons were identified as rounded YFP-  
709 labelled profiles directly apposed to labelled PN dendrites.

### 710 ***Optogenetic probe surgery***

711 Animals were anaesthetised with isoflurane (5% initial, 1.5-2% maintenance) shaved over the thoracolumbar  
712 vertebral column, secured in a stereotaxic frame and the surgical site was cleaned with chlorhexadine. Using  
713 aseptic procedures, a 3 cm incision was made over the T10-L1 vertebrae and paraspinal musculature  
714 removed. The intervertebral space between T12 and T13 was cleared to expose the spinal cord and overlying  
715 dura. Surgical staples were attached to the corresponding T12 and T13 to provide a rigid fixation point of  
716 attachment for the fiber optic probe. A probe (400 nm core, 1 mm fiber length, Thor Labs, New Jersey,  
717 U.S.A) was then positioned over the exposed spinal cord, between the staples, and fixed in place using  
718 orthodontic crown and bridge cement (Densply, Woodbridge, Canada). The surgical site was closed with  
719 sutures and surgical staples, and the animals were allowed to recover before being returned to their home  
720 cage for 7 days before spinal *in vivo* photostimulation.

### 721 ***In vivo photostimulation and behaviour***

722 Animals were briefly anaesthetised (isoflurane, 5%) to attach a fiber optic patch cord (400 nm core, Thor  
723 Labs) to the implanted fiber optic probe before being placed in a small Perspex testing cylinder (10 cm  
724 diameter, 30 cm height) and allowed to habituate for 30 mins in the three days preceding photostimulation  
725 and for 20 minutes prior to photostimulation. The patch cord was attached to a high intensity LED light  
726 source (DC2100, 470 nm, Thor Labs) and photostimulation (10 mW, 10 ms pulses @ 10 Hz for 10 s) was  
727 delivered. Behavioural responses were recorded using a Panasonic video camera (Panasonic HC-V770M,  
728 Panasonic, Kadoma, Japan). In all experiments, animals were first introduced and acclimatised to the testing  
729 chamber for 3 days prior to testing, and video recordings captured 5 minutes of behaviour before and after  
730 photostimulation.

731 In some experiments the testing conditions were altered to address specific aspects of the photostimulation  
732 response. The relationship between stimulation intensity and behaviour was assessed in a subset of animals  
733 (n=6) received varying photostimulation intensities (0.5-20 mW, 10 ms pulses @ 10 Hz for 10 s), with a 30  
734 min break between each stimulus. To assess the functional consequences of repeated spinal

735 photostimulation, animals (n=9) received 2 photostimuli delivered 2 mins apart. To test the nociceptive  
736 nature of spinal photostimulation, animals (n=5) were administered morphine 30 minutes prior to  
737 photostimulation. Three morphine doses were assessed (3, 10 and 30mg/kg, s.c), as well as a saline vehicle  
738 control. Animals first underwent two photostimulation intensities (10 and 20 mW) with no morphine to  
739 determine baseline responses. Drug treatments were randomly assigned such that each animal received all  
740 concentrations and a 48 h interval between each drug administration allowed morphine washout. In  
741 experiments to assess the activation of higher order brain regions in response to photostimulation, animals  
742 (n=5 CR<sup>cre</sup>;Ai32, n=5 CReGFP) were placed in a testing chamber (30 cm length, 25 cm width and 40 cm  
743 height) with food and water available *ad libitum* for 6 hrs to eliminate any Fos activation caused by handling,  
744 the environment, or anaesthesia. Animals received photostimulation (10 mW, 10 ms pulses @ 10 Hz for 10  
745 s) before being left for a further 2 h, to allow development of Fos expression, and then perfused  
746 transcardially with 4% PFA. Brains were dissected and post-fixed in 4% PFA overnight then stored in 30%  
747 sucrose. Serial sections were cut from the forebrain (40 µm) and brainstem (50 µm) using a freezing  
748 microtome (Leica Microsystems, SM2000R) and a 1 in 4 series were processed for Fos protein labelling  
749 (1:5000, rabbit polyclonal. Santa Cruz Biotechnology, CA, USA) as previously described<sup>50</sup>. Fos positive  
750 cells were then manually counted from cingulate, insula, primary somatosensory cortex, parabrachial nucleus  
751 and periaqueductal grey. Counts were made on at least 4 sections ipsilateral to the stimulus side at 8.5X  
752 magnification.

753 In photo-inhibition experiments the fiber optic patch cord was attached to CR-NpHR animals (n = 8) which  
754 were then acclimatised to the testing tube as described previously. The patch cord was attached to the same  
755 laser described in *in vitro* methods. The simplified up down method (SUDO) (Bonin et al., 2014) of von Frey  
756 testing was used to establish mechanical withdrawal thresholds both with and without photo-inhibition.  
757 Animal were habituated in the testing chamber for 30 min for the 3 days prior to testing. Over four days of  
758 testing the von Frey threshold testing was assessed in each animal once with and once without photo-  
759 inhibition in alternating order. Withdrawal scores averaged across the four trial days and converted to  
760 withdrawal threshold in grams (Bonin et al., 2014).

761 All *in vivo* photostimulation-induced behaviour was analysed using JWatcher v1.0 event recorder (Blumstein  
762 and Daniel, 2007). Behavioural responses were encoded from the video recordings of photostimulation

763 including 5 minutes pre- and post-photostimulation, played back at half-speed (30 fps). All behaviours  
764 targeted at the left or right hind limbs and the midline were coded. In a subset of videos coding was  
765 expanded to differentiate left/right paw and leg, as well as back and tail. The duration of all targeted  
766 behaviours was then binned (time epochs) and converted to a colour scale showing the proportion of epoch  
767 spent in specific behaviours for visualization.

### 768 ***Conditioned place aversion testing***

769 Conditioned place aversion (CPA) testing was used to assess the aversive nature of CR-ChR2  
770 photostimulation. The CPA apparatus consisted of a two-chamber black perspex box (50 cm length, 25 cm  
771 width and 50 cm height) with a divider allowing free access to each chamber. To differentiate the two  
772 chambers one side contained cross-hatched markings using tape on the floor and crosses on the walls. On the  
773 first experimental day each animals baseline preference was determined. The optic patch cord was attached  
774 (as described above) and animal placed in the centre of the CPA apparatus. Animals were allowed to freely  
775 move between both chambers for 10 mins, prior to commencement of data collection. The chamber where an  
776 animal spent the most time was deemed the preferred side, and subsequently designated 'photostimulation  
777 on' while the non-preferred side was designated 'photostimulation off'. Animals then underwent 4 x 20 min  
778 trials over 2 days (morning and afternoon), with the condition that entry into the 'photostimulation on'  
779 chamber triggered photostimulation (10 mW, 10 ms pulses @ 10 Hz for 10 s in every minute ie. 10 s on, 50 s  
780 off) until the animal returned to the 'photostimulation off' chamber. Following the CPA trials, the  
781 persistence of the CPA memory was assessed via short term (1 h post testing - STM) and long term tests (24  
782 h post testing - LTM). In these tests animals were allowed to freely move around the CPA apparatus for 10  
783 mins with no photostimulation. All trials and tests were captured from above the CPA apparatus (via the  
784 video camera), digitized, then analysed using semi-automated behavioural tracking procedures within  
785 Ethovision software (Noldus Information Technology, Wageningen, Netherlands).

### 786 ***Statistical analysis***

787 All data are presented as mean  $\pm$  the standard error of the mean (SEM) unless otherwise stated. Shapiro-  
788 Wilk's test determined if data were normally distributed. For normally distributed data one-way ANOVAs  
789 were performed with a student Newman-Keuls *post-hoc* test to compare oEPSC and oIPSC properties

790 between neuron groups and for all behaviour analyses. Non-normally distributed data was compared using  
791 the Kruskal Wallis test with Wilcoxon–Mann–Whitney *post-hoc* testing. Paired t-tests compared sEPSC  
792 frequency before and after photostimulation in CR<sup>+</sup> neuron and projection neuron populations.



793

### **Acknowledgements**

794 We thank Dr Philippe Ciofi for the guinea pig anti-somatostatin primary antibody, and both Christine Watt  
795 and Robert Kerr for expert technical assistance. This work was funded by the National Health and Medical  
796 Research Council (NHMRC) of Australia (grants 631000 and 1043933 to B.A.G, 1067146 to R.J.C. and  
797 1125478 to C.V.D), the Biotechnology and Biological Sciences Research Council (BBSRC) of the United  
798 Kingdom (grant BB/J000620/1 and BB/P007996/1 to D.I.H.), and the Hunter Medical Research Institute  
799 (B.A.G. and R.J.C.).

800

### **Author Contributions**

801 K.M.S., R.J.C., P.J., C.V.D., D.I.H. and B.A.G. conceived and designed the research study; K.M.S., T.J.B,  
802 A.C. O.D., K.A.B., J.A.I., and S.A.D. conducted experiments and acquired data; M.W. kindly provided  
803 reagents; K.M.S., T.J.B, M.A.G, A.C., O.D., S.A.D., J.A.I., K.A.B., D.I.H., and B.A.G. analyzed data;  
804 K.M.S., C.V.D., D.I.H. and B.A.G. wrote the manuscript; all authors edited the final version of the  
805 manuscript.

806

### **Competing financial interests**

807 The authors do not have any conflict of interest.

808

809 **Table 1: Photostimulation response characteristics**

| Neuron type  | Input           | n  | Latency (ms)                     | Amplitude (pA)                | Rise time (ms)                    | Half-width (ms)                    | Charge (pA.ms)             |
|--------------|-----------------|----|----------------------------------|-------------------------------|-----------------------------------|------------------------------------|----------------------------|
| CR-ChR2 (CR) | oEPSC           | 12 | 8.6 ± 1.2                        | 87.59 ± 20.04                 | 2.67 ± 0.41                       | 4.90 ± 0.62                        | 0.66 ± 0.20                |
| Plexus (P)   | oEPSC           | 11 | 4.8 ± 0.6 * <sup>CR, D, PN</sup> | 51.42 ± 19.88                 | 2.89 ± 0.63                       | 5.40 ± 1.60                        | 0.52 ± 0.17                |
| Dorsal (D)   | oEPSC           | 13 | 7.3 ± 1.1                        | 126.72 ± 52.03                | 3.22 ± 0.64                       | 6.61 ± 1.16                        | 1.93 ± 0.98                |
| PN (PN)      | oEPSC           | 13 | 7.9 ± 1.4                        | 70.68 ± 131.40                | 5.54 ± 1.44 * <sup>CR, P, D</sup> | 10.82 ± 1.60 * <sup>CR, P, D</sup> | 1.35 ± 0.55                |
| CR-ChR2 (CR) | Mixed-oIPSC (M) | 10 | 7.91 ± 0.53                      | 146.43 ± 70.33                | 14.82 ± 3.90                      | 74.39 ± 26.28                      | 29.25 ± 23.87              |
|              | Gly-oIPSC (G)   | 10 |                                  | 52.66 ± 12.75                 | 4.36 ± 1.17 * <sup>M</sup>        | 16.72 ± 3.42 * <sup>M</sup>        | 9.77 ± 7.26                |
| Plexus (P)   | Mixed-oIPSC (M) | 16 | 8.32 ± 0.61                      | 237.16 ± 70.72                | 7.74 ± 0.60                       | 71.70 ± 10.00                      | 27.29 ± 9.30               |
|              | Gly-oIPSC (G)   | 16 |                                  | 104.28 ± 40.55 * <sup>M</sup> | 6.27 ± 1.33                       | 40.56 ± 19.30 * <sup>M</sup>       | 8.17 ± 4.13 * <sup>M</sup> |
| Dorsal (D)   | Mixed-oIPSC (M) | 4  | 5.72 ± 0.53                      | 224.87 ± 76.67                | 5.99 ± 1.67                       | 19.75 ± 2.93                       | 17.95 ± 10.66              |
|              | Gly-oIPSC (G)   | 4  |                                  | 81.34 ± 50.52 * <sup>M</sup>  | 2.645 ± 0.35 * <sup>M</sup>       | 15.87 ± 5.58                       | 5.18 ± 3.46 * <sup>M</sup> |

810 Values are mean ± SEM. \* denotes p<0.05 between cell types (CR vs. P vs. D vs. PN), or oIPSC type (M vs. G)

811  
812**Table 2: Primary Antibody Details**

| Antibody     | Species    | Epitope                                               | Cat no           | RRID        | Manufacturer             | Ref                              | Dilution |
|--------------|------------|-------------------------------------------------------|------------------|-------------|--------------------------|----------------------------------|----------|
| Calretinin   | Goat       | Human recombinant calretinin                          | CG1              | AB_10000342 | SWANT                    | (Schiffmann et al., 1999)        | 1:1000   |
| cFOS         | Goat       | Recombinant full-length protein                       | sc-52-G          |             | Santa Cruz Biotechnology | (Ganley et al., 2015)            | 1:2000   |
| GFP          | Chicken    | Recombinant full-length protein                       | Ab13970          |             | Abcam                    | (Ganley et al., 2015)            | 1:1000   |
| Homer1       | Goat       | Amino acids 1-175 of mouse Homer 1                    | Homer1-Go-Af1270 | AB_2631104  | Frontier Science         | (Nakamura et al., 2004)          | 1:1000   |
| mCherry      | Rat        | Full-length protein mCherry                           | M11217           | AB_2536611  | Thermo Fisher Scientific | (Schwarz et al., 2015)           | 1:1000   |
| NK1R         | Rabbit     | C-terminus of NK1R of rat origin, amino acids 393-407 | S8305            |             | Sigma-Aldrich            | (Ptak et al., 2002)              | 1:1000   |
| Pax2         | Rabbit     | Amino acids 188-385 of the mouse protein              | 716000           |             | Life Technologies        | (Gutierrez-Mecinas et al., 2017) | 1:1000   |
| PKC $\gamma$ | Rabbit     | C-terminus of the mouse protein                       | sc211            |             | Santa Cruz Biotechnology | (Gutierrez-Mecinas et al., 2016) | 1:1000   |
| Somatostatin | Guinea pig | Somatostatin-24                                       | IS-3/51          |             | P. Ciofi                 | (Ciofi et al., 2006)             | 1:1000   |
| Somatostatin | Rabbit     | Somatostatin-28 and somatostatin-25                   | T-4103           |             | Peninsula                | (Proudlock et al., 1993)         | 1:1000   |
| VGLUT2       | Mouse      | C-terminal sequence of rat VGLUT-2                    | MB5504           | AB_2187552  | Millipore                | (Hrabovszky et al., 2006)        | 1:500    |

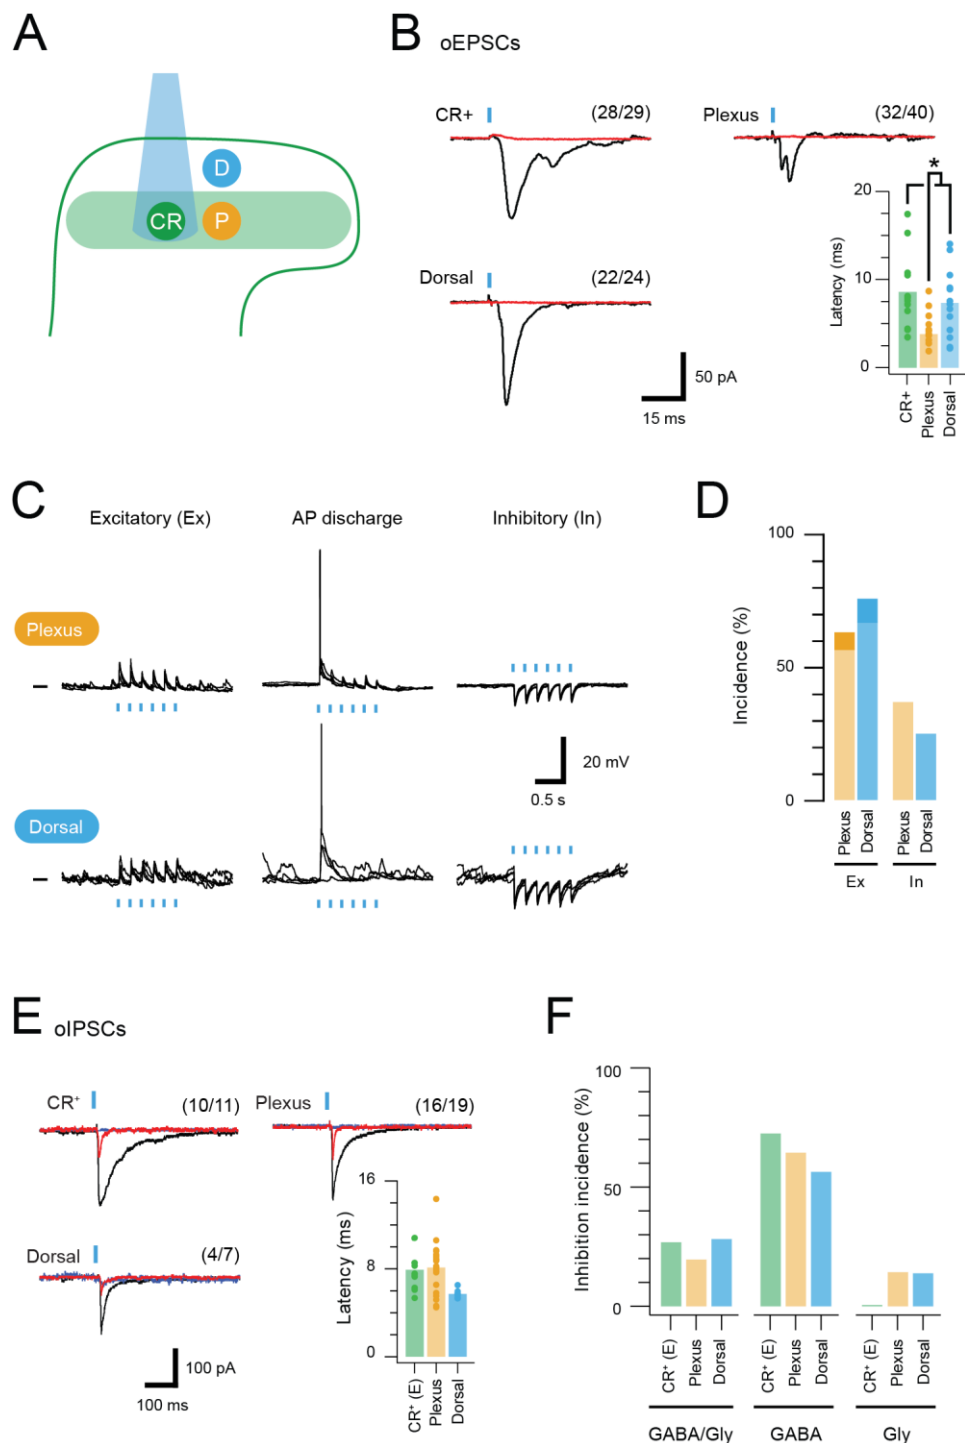

813  
814

815 **Figure 1. CR-ChR2 neurons provide excitatory drive throughout the DH.** (A), Schematic shows DH  
816 populations assessed for CR-ChR2-evoked excitatory input: CR-ChR2<sup>+</sup> neuron (green), interneurons  
817 (yellow) located within the CR<sup>+</sup> plexus (light green shading), and interneurons located dorsal to the CR<sup>+</sup>  
818 plexus (blue). (B), Photostimulation (16 mW, 1 ms) evoked robust inward currents under voltage clamp in  
819 each DH population. Traces show averaged response (black) to photostimulus (blue bar), CNQX (10 μM)  
820 abolished all responses (red). Values on each trace show number of recordings that exhibited a light induced  
821 inward current. Bar graph shows group data comparing oEPSCs latency, which was significantly shorter in  
822 interneurons within the CR plexus (p=0.047). (C), Representative traces show responses during  
823 photostimulation recorded from interneurons within the CR<sup>+</sup> plexus (upper) and dorsal to this region (lower),  
824 in current clamp. In some neurons photostimulation only caused subthreshold depolarization (excitatory,  
825 left); in others depolarization evoked AP discharge (center), while in some neurons the postsynaptic response  
826 during photostimulation was inhibitory in the form of transient membrane hyperpolarisations (right).  
827 Photostimulation applied at a membrane potential of -60mV. (D), Bar graphs show group data on the

828 incidence of photostimulation responses. Darker shading denotes percentage of excitatory responses that  
829 cause AP discharge in each group. (E), Traces show averaged optically evoked inhibitory postsynaptic  
830 currents (oIPSCs) recorded in response to photostimulation (black trace), and following bath applied  
831 bicuculline (10 $\mu$ M, red trace) and strychnine (1 $\mu$ M, blue trace), left to right. Bar graph compares the latency  
832 of inhibitory responses from photostimulation onset. (C), Photostimulation-evoked inhibitory responses were  
833 classed as mixed (GABA/glycine, left), GABA-dominant (middle) or glycine dominant (right) based on  
834 bicuculline sensitivity. The incidence of each form of inhibition was similar across the populations assessed.

835

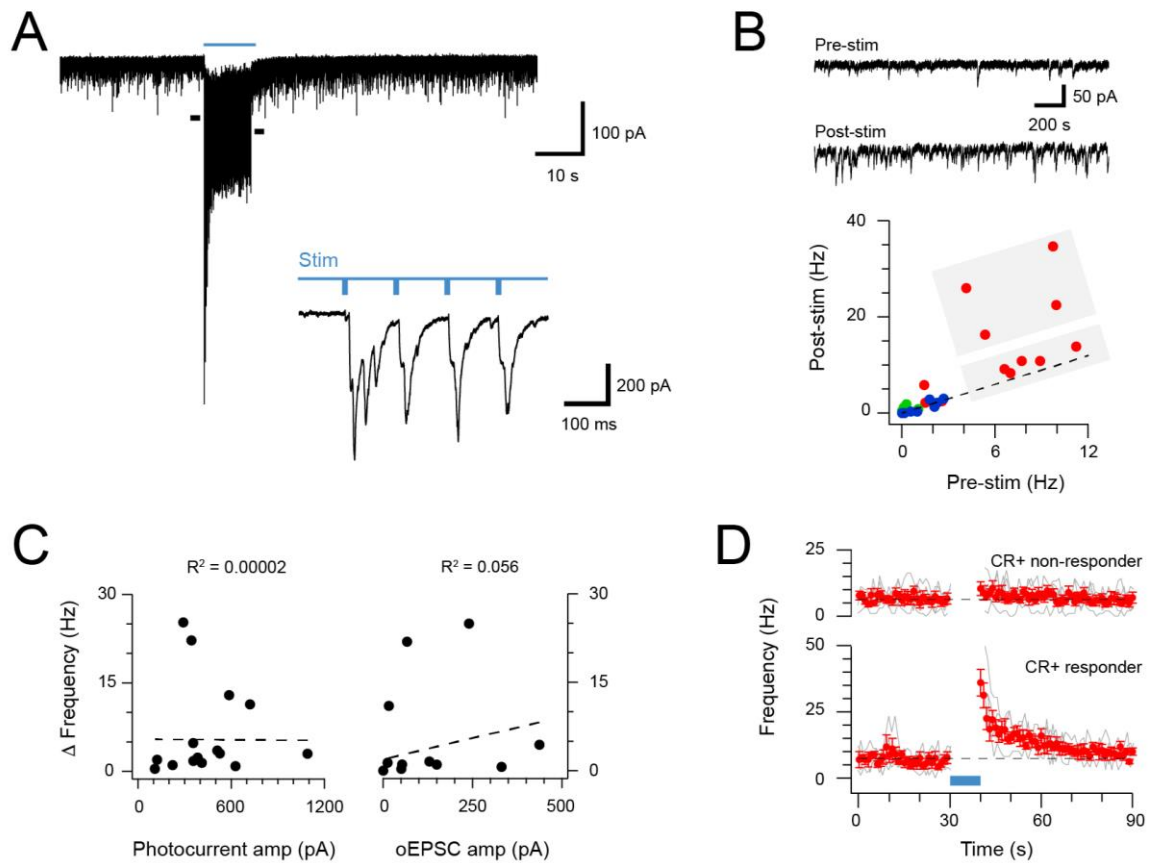

836

837 **Figure 2. Extended CR-ChR2 photostimulation enhances spontaneous excitatory activity.** (A), spinal cord  
 838 slice recordings from a CR-ChR2<sup>+</sup> neuron showing spontaneous excitatory postsynaptic currents before,  
 839 during and following full field photostimulation (blue bar, 16 mW, 10 ms pulses @ 10 Hz, 10 s). Inset shows  
 840 onset of photostimulation and response on expanded time scale. Note a dramatic increase in sEPSC  
 841 frequency persists following the photostimulation period. (B), Traces (upper) show 2 s pre and post  
 842 photostimulation on an expanded timescale from A. Plot (lower) shows group data comparing sEPSC  
 843 frequency in the pre- and post-photostimulation (excitatory CR-ChR2 cells = red, inhibitory CR-ChR2 cells  
 844 = green, unidentified DH cells = blue). Data on or near the unity line (dashed) indicates little change between  
 845 pre- and post-photostimulation sEPSC frequency, however, four CR-ChR2 cells exhibited a substantial  
 846 increase in post photostimulation sEPSC frequency (large grey box). (C) Plots compare pre- to post-  
 847 photostimulation frequency sEPSC ( $\Delta$  frequency) with photocurrent and photostimulated oEPSC amplitudes  
 848 (left and right, respectively). There was no correlation between  $\Delta$  frequency and either property. (D) Plots  
 849 compare mean sEPSC frequency (red) across photostimulation protocol for CR-ChR2 cells deemed to  
 850 exhibit a post-photostimulation increase ( $n=4$ , post-photostimulation sEPSC frequency exceeded mean pre-  
 851 photostimulation sEPSC frequency  $\pm 4SD$ ), and CR-ChR2 cells with a similar baseline sEPSC frequency,  
 852 but no post-photostimulation change.

853

854

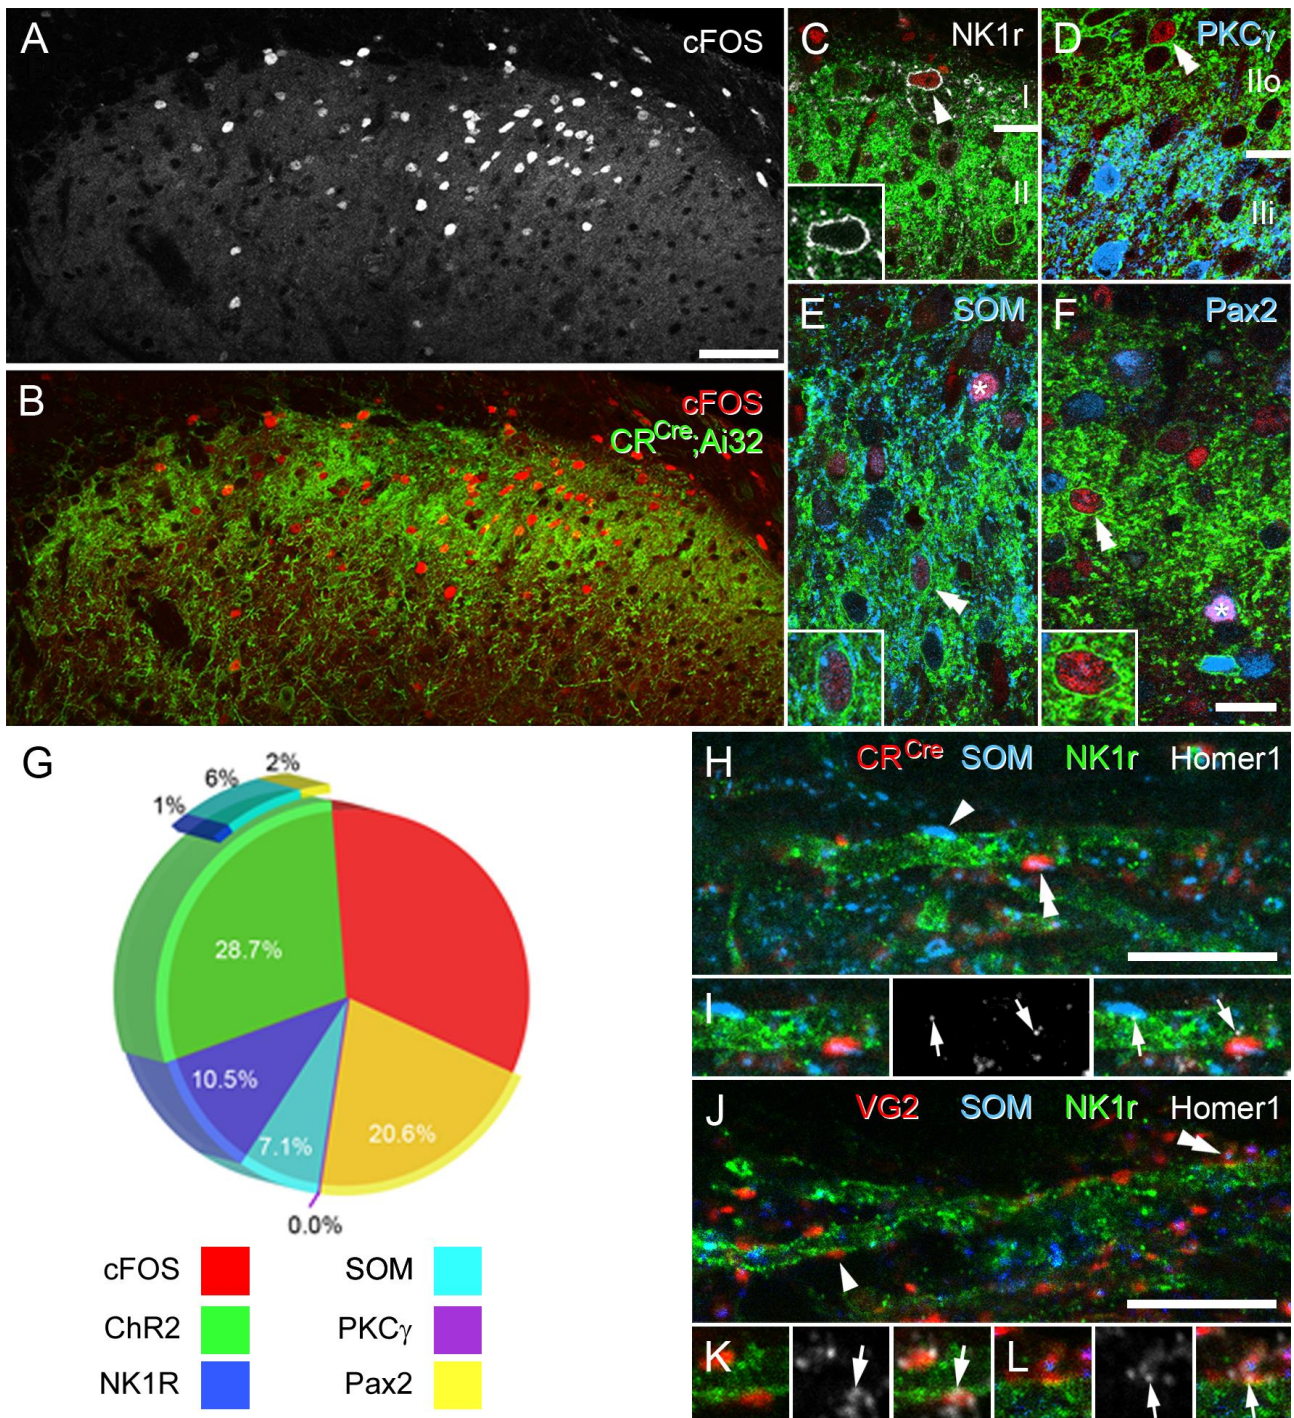

855

856

857 **Figure 3. CR-ChR2 neuron photostimulation activates multiple DH neuron populations.** (A), Following  
 858 photostimulation in a deeply anaesthetized CR<sup>cre</sup>;Ai32 mouse, robust cFos-IR profiles (white) were detected  
 859 in laminae I and II primarily. (B), These cFOS-IR cells (red) were restricted to the ipsilateral DH, and largely  
 860 confined to the CR-ChR2-YFP plexus (green). (C), Lamina I neurons often expressed cFOS, and these were  
 861 commonly immunolabelled for NK1R (arrowhead; white). In these cells, NK1R-immunolabelling was  
 862 confined to the cell membrane (inset). (D), Immunolabelling for cFos-IR (red) was often detected in cells  
 863 that expressed YFP (green; double arrowhead), but not in cells that were immunolabelled for PKC $\gamma$  (blue).  
 864 (E), Many cFOS-labelled cells expressed both YFP and SOM (blue) and YFP (double arrowhead and inset),  
 865 whereas others expressed only SOM (asterisk). (F), Photostimulation induced cFOS expression in Pax2-  
 866 expressing interneurons (asterisk; blue), with some of these cells also showing immunolabelling for YFP  
 867 (double arrowhead and inset). (G), Pie graph shows the proportion of photostimulation-evoked cFos  
 868 expression accounted for by directly activating CR-ChR2 neurons (28.7%), and those populations recruited  
 869 by CR-ChR2 activity including NK1R<sup>+</sup> neurons (10.5%), SOM<sup>+</sup> neurons (7.1%), and Pax2<sup>+</sup> neurons

870 (20.6%). The remaining fraction (33.1%) are likely to represent unidentified excitatory populations as they  
871 did not express Pax-2. **(H-I)**, Most excitatory synaptic inputs on to NK1R-expressing dendrites (green) in  
872 lamina I (arrows) were derived from axon terminals immunolabelled for SOM (arrowhead; blue), many of  
873 which also originated from CR-expressing cells (double arrowhead; red). Excitatory synaptic inputs on to the  
874 dendrites of lamina I NK1R-expressing cells (green) were identified using immunolabelling for Homer 1  
875 (white; arrows). **(J-L)**, Most Homer puncta were directly apposed to axon terminals immunolabelled for  
876 VGLUT2 (arrowhead; I; red), many of which also co-expressed SOM (double arrowhead; J; blue). Scale  
877 bars (in  $\mu\text{m}$ ): A, B = 100; C-F = 20; H and J = 10.

878



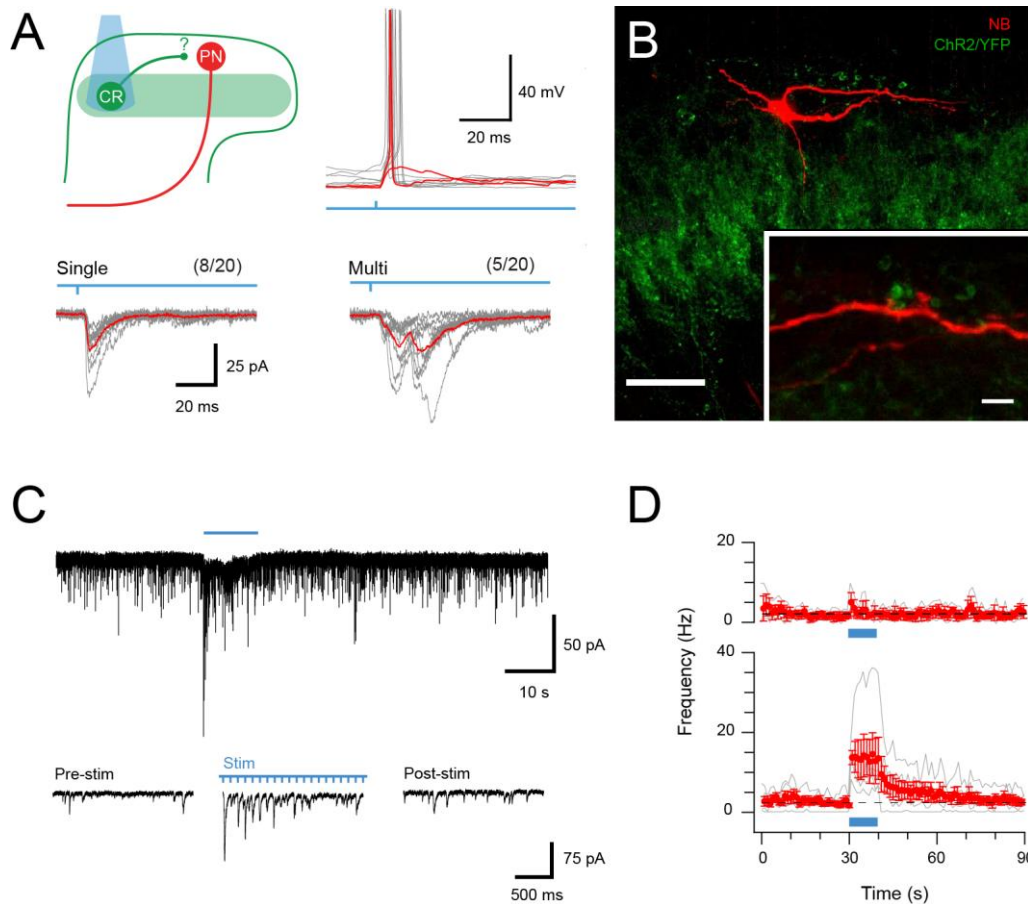

879

880

881 **Figure 4. CR-ChR2 neurons provide synaptic input to LI PNs.** (A), Schematic (upper left) shows  
882 experimental setup with CR-ChR2 neuron (CR) photostimulation (PS) applied while monitoring retrograde  
883 virus labelled projection neuron (PN) activity (n = 20 cells from 2 animals). Lower traces show example PS  
884 evoked inward currents recorded in PNs under voltage clamp. Responses (grey) showed either single (left) or  
885 multicomponent responses (right) during PS (blue bar) with the average response overlaid (red). Values  
886 above show number of PN recordings that exhibited PS responses. Upper right traces show an example PN  
887 recording under current clamp with PS evoked input from CR neurons able to initiate AP discharge in PNs  
888 (individual subthreshold and suprathreshold responses in red). (B), Image shows neurobiotin recovered PN  
889 (red) relative to expression of YFP/ChR2 in CR neurons (green). High magnification inset shows PN  
890 dendrite in close apposition with YFP/ChR2 puncta. Scale bars (in μm): 50; inset 5. (C), Trace shows  
891 recording from a PN with EPSCs before, during and following full field PS of CR neurons (blue bar, 16 mW,  
892 10 ms pulses @ 10 Hz, 10 seconds). Insets below show EPSC activity before, during and following PS on  
893 expanded time scale. Note the increase in EPSCs during and following the PS period. (D) Plots compare  
894 mean EPSC frequency (red) for PNs deemed to exhibit a significant PS increase (lower, n=5, EPSC  
895 frequency during PS exceeded mean baseline frequency ± 4SD), and PNs with a similar baseline EPSC  
896 frequency, but no PS evoked change in activity (upper, n=3).

897

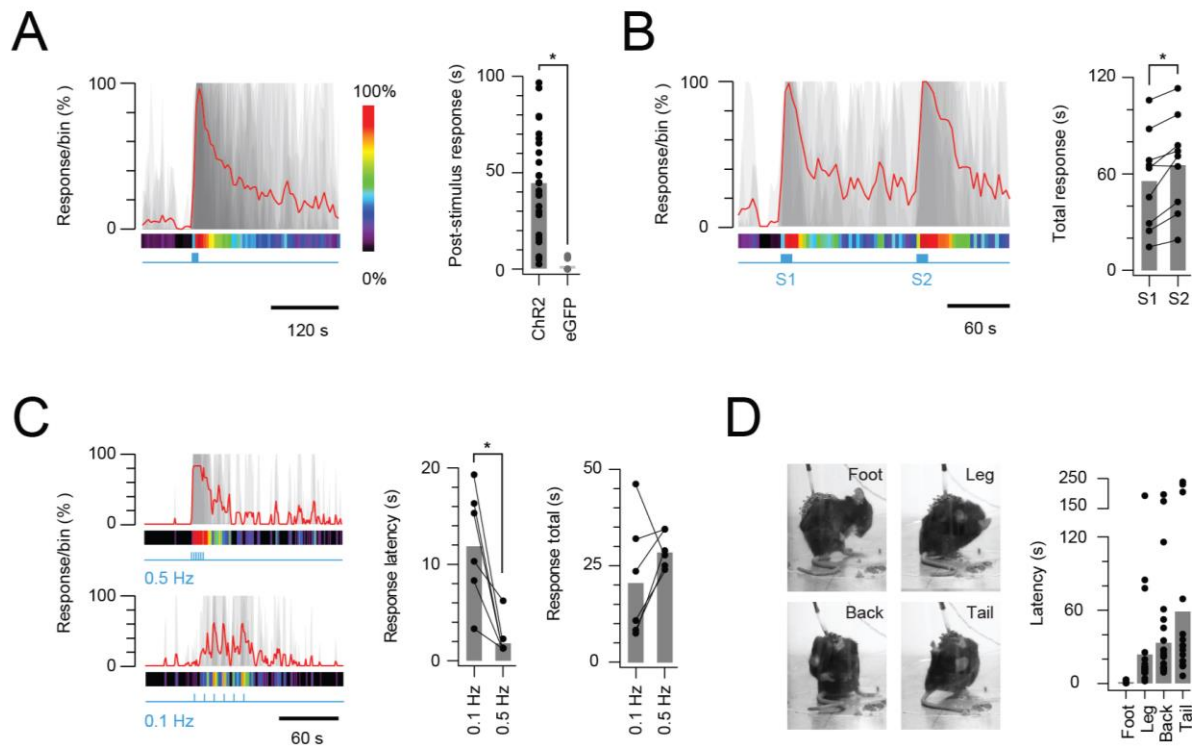

898

899 **Figure 5. In vivo photostimulation response characteristics.** (A), Left plot shows overlaid peristimulus  
 900 histograms of photostimulation responses in CR-ChR2 mice (n=25, grey traces) with response duration  
 901 binned in 5 s epochs. Mean response is shown in red and converted to a heat bar (bins color coded to percent  
 902 time groomed (red = 100%, black = 0%). Right plot compares total response duration for CR-ChR2 mice and  
 903 a control group of CR-eGFP mice (n=9). Note CR-ChR2 mouse responses varied with an average of 45  
 904 seconds nocifensive behavior outlasting the 10 s photostimulation period. (B), Left plot shows overlaid  
 905 responses from a subset of animals (n=6) that received two successive photostimuli, separated by 120 s (10  
 906 mW, 10 Hz, 10 s, grey traces). Right plot compares total response duration to initial (S1) and repeat  
 907 photostimulation (S2) highlighting an average 10 s increase in the second response (p=0.005). (C), Left plots  
 908 show overlaid responses to brief subthreshold photostimulation trains ( $0.72 \pm 0.36$  mW, 10 ms pulses)  
 909 delivered at two frequencies (0.1 Hz – lower, and 0.5 Hz – upper). Right plots compare latency to  
 910 photostimulation responses and total response duration at the two stimulation frequencies. Repeated  
 911 subthreshold photostimuli summate to evoke a response and latency is significantly reduced by increased  
 912 stimulation frequency (p=0.012). (D) Photostimulation responses mapped to the body region targeted in a  
 913 subset of CR-ChR2 animals (paw, leg, back or tail; n=12). Images show examples of nocifensive responses  
 914 directed to the hind paw, hindlimb, back, and tail. Plots (right) compare group data for the latency of  
 915 nocifensive behavior directed to different body regions. Hind paw focused responses show the shortest  
 916 latency followed by significantly longer latencies for responses targeting the hind limb, back and then tail.

917

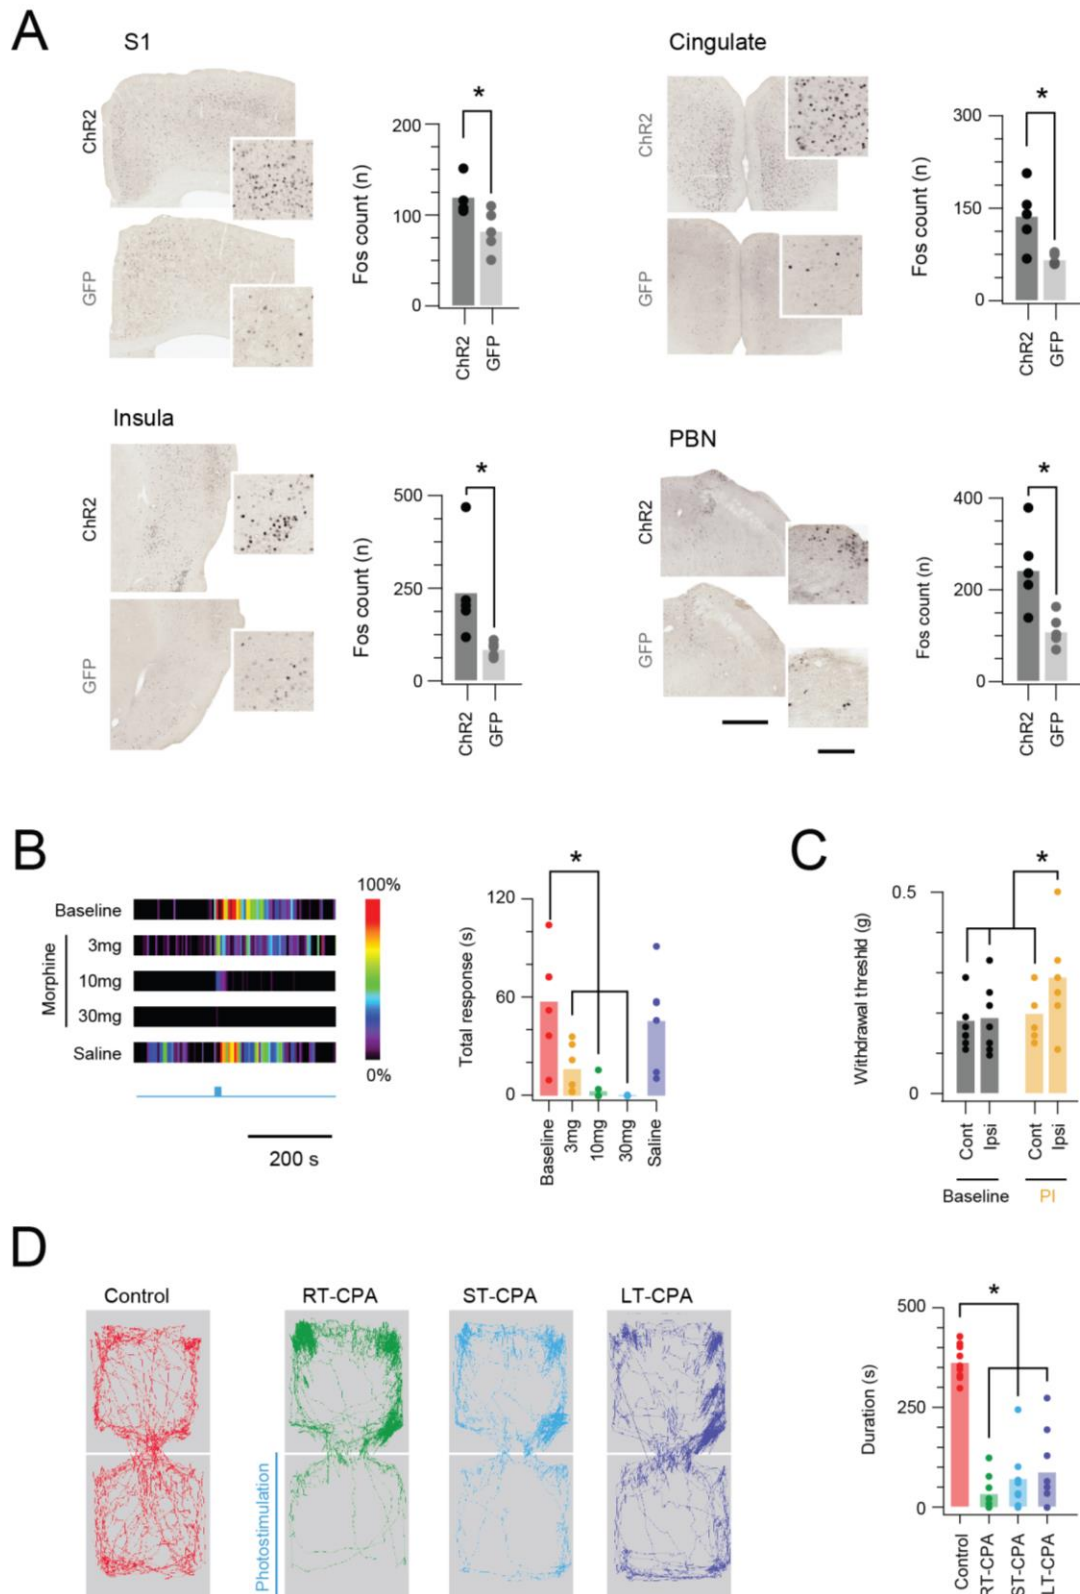

918

919 **Figure 6. *In vivo* CR-ChR2 photostimulation responses have nociceptive characteristics.** (A), Images show  
 920 representative brain sections from CR<sup>cre</sup>;Ai32 (upper) and CR-GFP animals (lower) immunolabelled for Fos  
 921 protein following *in vivo* spinal photostimulation (10 mW at 10 Hz, 10 min), insets show Fos labelled  
 922 profiles at higher magnification. Bar graphs (right) of group data compare Fos<sup>+</sup> neuron counts in  
 923 corresponding brain regions. The number of Fos<sup>+</sup> profiles was elevated in CR<sup>cre</sup>;Ai32 photostimulated mice  
 924 in the somatosensory cortex (S1,  $p=0.043$ ), anterior cingulate cortex (Cingulate,  $p=0.016$ ), Insula cortex  
 925 (Insula,  $p=0.0346$ ), and parabrachial nucleus (PBN,  $p=0.023$ ). Scale bars = 500 $\mu$ m, inset = 100 $\mu$ m. (B),

926 Heat bars (left) show average photostimulation responses (10 mW at 10 Hz, 10 s), from a subset of animals  
927 (n=6) assessed under baseline conditions, after, three morphine doses (3, 10, and 30mg/kg i.p.), and control  
928 saline injection. Bar graphs (right) compares group data for total nocifensive response duration under each  
929 condition. Morphine produced a dose dependent block of the nocifensive response compared to baseline  
930 (3mg/kg,  $p=0.024$ ; 10mg/kg,  $p=0.002$ ; 30mg/kg,  $p=0.001$ ). (C), Group plots compare mean withdrawal  
931 threshold (von Frey) for hind paws ipsilateral and contralateral to spinal fiber optic probe placement. Left  
932 bars show mean withdrawal threshold under baseline conditions and right bars show mean withdrawal  
933 threshold assessed with NpHR3-mediated photoinhibition of CR<sup>+</sup> neurons in the ipsilateral spinal cord.  
934 Spinal photoinhibition selectively increased withdrawal threshold for the ipsilateral hindpaw, consistent with  
935 CR<sup>+</sup> neuron inhibition decreasing mechanical sensitivity (cont = contralateral, ipsi = ipsilateral). (D) Four  
936 maps (left) show mouse activity traces during the conditioned place aversion (CPA) testing under: control  
937 conditions (no photostimulation - red trace); real time CPA training (RT-CPA – green trace) where one arena  
938 is assigned for photostimulation (10mW, 10Hz, 10s in every minute) on entry; short-term CPA (ST-CPA),  
939 assessed 1 h following the RT-CPA session with no photostimulation (blue trace); and long-term CPA (LT-  
940 CPA), assessed 24 h after the RT-CPA session again with no photostimulation (purple trace). Bar graph (right)  
941 compares time spent in the photostimulation arena during CPA testing. Spinal photostimulation of CR-ChR2  
942 neurons established a robust real-time conditioned place aversion by the fourth RT-CPA session (green)  
943 significantly reducing time in the photostimulation arena ( $p<0.0001$ ). These reductions persisted during ST-  
944 CPA ( $p=0.0001$ ) and LT-CPA ( $p=0.0001$ ).

945

946  
947  
948  
949  
950  
951  
952  
953  
954  
955  
956  
957  
958  
959  
960  
961  
962  
963  
964  
965  
966  
967  
968  
969  
970  
971  
972  
973  
974  
975  
976  
977  
978  
979  
980  
981  
982  
983  
984  
985  
986  
987  
988  
989  
990  
991  
992  
993  
994  
995

## References

- BABA, H., KOHNO, T., MOORE, K. A. & WOOLF, C. J. 2001. Direct activation of rat spinal dorsal horn neurons by prostaglandin E<sub>2</sub>. *J Neurosci*, 21, 1750-6.
- BASBAUM, A. I., BAUTISTA, D. M., SCHERRER, G. & JULIUS, D. 2009. Cellular and molecular mechanisms of pain. *Cell*, 139, 267-84.
- BLUMSTEIN, D. T. & DANIEL, J. C. 2007. *Quantifying behaviour the JWatcher way*, Sinauer Associates Inc.
- BONIN, R. P., BORIES, C. & DE KONINCK, Y. 2014. A simplified up-down method (SUDO) for measuring mechanical nociception in rodents using von Frey filaments. *Mol Pain*, 10, 26.
- BONIN, R. P., WANG, F., DESROCHERS-COUTURE, M., GA SECKA, A., BOULANGER, M. E., COTE, D. C. & DE KONINCK, Y. 2016. Epidural optogenetics for controlled analgesia. *Mol Pain*, 12.
- BRAZ, J. M., JUAREZ-SALINAS, D., ROSS, S. E. & BASBAUM, A. I. 2014. Transplant restoration of spinal cord inhibitory controls ameliorates neuropathic itch. *J Clin Invest*, 124, 3612-6.
- CAPUTI, A., ROZOV, A., BLATOW, M. & MONYER, H. 2009. Two calretinin-positive GABAergic cell types in layer 2/3 of the mouse neocortex provide different forms of inhibition. *Cereb Cortex*, 19, 1345-59.
- CHRISTENSEN, A. J., IYER, S. M., FRANCOIS, A., VYAS, S., RAMAKRISHNAN, C., VESUNA, S., DEISSEROTH, K., SCHERRER, G. & DELP, S. L. 2016. In Vivo Interrogation of Spinal Mechanosensory Circuits. *Cell Rep*, 17, 1699-1710.
- CIOFI, P., LEROY, D. & TRAMU, G. 2006. Sexual dimorphism in the organization of the rat hypothalamic infundibular area. *Neuroscience*, 141, 1731-45.
- COULL, J. A., BOUDREAU, D., BACHAND, K., PRESCOTT, S. A., NAULT, F., SIK, A., DE KONINCK, P. & DE KONINCK, Y. 2003. Trans-synaptic shift in anion gradient in spinal lamina I neurons as a mechanism of neuropathic pain. *Nature*, 424, 938-42.
- CUI, L., MIAO, X., LIANG, L., ABDUS-SABOOR, I., OLSON, W., FLEMING, MICHAEL S., MA, M., TAO, Y.-X. & LUO, W. 2016. Identification of Early RET+ Deep Dorsal Spinal Cord Interneurons in Gating Pain. *Neuron*, 91, 1137-1153.
- DUAN, B., CHENG, L., BOURANE, S., BRITZ, O., PADILLA, C., GARCIA-CAMPANY, L., KRASHES, M., KNOWLTON, W., VELASQUEZ, T., REN, X., ROSS, S., LOWELL, B. B., WANG, Y., GOULDING, M. & MA, Q. 2014. Identification of spinal circuits transmitting and gating mechanical pain. *Cell*, 159, 1417-1432.
- FOSTER, E., WILDNER, H., TUDEAU, L., HAUETER, S., RALVENIUS, WILLIAM T., JEGEN, M., JOHANNSEN, H., HÖSLI, L., HAENRAETS, K., GHANEM, A., CONZELMANN, K.-K., BÖSL, M. & ZEILHOFER, HANNS U. 2015. Targeted Ablation, Silencing, and Activation Establish Glycinergic Dorsal Horn Neurons as Key Components of a Spinal Gate for Pain and Itch. *Neuron*, 85, 1289-1304.
- FRANCOIS, A., LOW, S. A., SYPEK, E. I., CHRISTENSEN, A. J., SOTOUDEH, C., BEIER, K. T., RAMAKRISHNAN, C., RITOLA, K. D., SHARIF-NAEINI, R., DEISSEROTH, K., DELP, S. L., MALENKA, R. C., LUO, L., HANTMAN, A. W. & SCHERRER, G. 2017. A Brainstem-Spinal Cord Inhibitory Circuit for Mechanical Pain Modulation by GABA and Enkephalins. *Neuron*, 93, 822-839.e6.
- GANLEY, R. P., IWAGAKI, N., DEL RIO, P., BASEER, N. & DICKIE, A. C. 2015. Inhibitory Interneurons That Express GFP in the PrP-GFP Mouse Spinal Cord Are Morphologically Heterogeneous, Innervated by Several Classes of Primary Afferent and Include Lamina I Projection Neurons among Their Postsynaptic Targets. 35, 7626-42.
- GRAHAM, B. A., BRICHTA, A. M. & CALLISTER, R. J. 2004. In vivo responses of mouse superficial dorsal horn neurones to both current injection and peripheral cutaneous stimulation. *J Physiol*, 561, 749-63.

- 996 GRAHAM, B. A., BRICHTA, A. M., SCHOFIELD, P. R. & CALLISTER, R. J. 2007. Altered potassium  
997 channel function in the superficial dorsal horn of the spastic mouse. *J Physiol*, 584, 121-  
998 36.
- 999 GRAHAM, B. A., SCHOFIELD, P. R., SAH, P. & CALLISTER, R. J. 2003. Altered inhibitory synaptic  
1000 transmission in superficial dorsal horn neurones in spastic and oscillator mice. *J Physiol*,  
1001 551, 905-16.
- 1002 GRAHAM, B. A., TADROS, M. A., SCHOFIELD, P. R. & CALLISTER, R. J. 2011. Probing glycine  
1003 receptor stoichiometry in superficial dorsal horn neurones using the spasmodic mouse. *J*  
1004 *Physiol*, 589, 2459-74.
- 1005 GUTIERREZ-MECINAS, M., BELL, A. M., MARIN, A., TAYLOR, R., BOYLE, K. A., FURUTA, T.,  
1006 WATANABE, M., POLGAR, E. & TODD, A. J. 2017. Preprotachykinin A is expressed by a  
1007 distinct population of excitatory neurons in the mouse superficial spinal dorsal horn  
1008 including cells that respond to noxious and pruritic stimuli. *Pain*, 158, 440-456.
- 1009 GUTIERREZ-MECINAS, M., FURUTA, T., WATANABE, M. & TODD, A. J. 2016. A quantitative  
1010 study of neurochemically defined excitatory interneuron populations in laminae I-III of  
1011 the mouse spinal cord. *Mol Pain*, 12.
- 1012 HACHISUKA, J., OMORI, Y., CHIANG, M. C., GOLD, M. S., KOERBER, H. R. & ROSS, S. E. 2018.  
1013 Wind-up in lamina I spinoparabrachial neurons: a role for reverberatory circuits. *Pain*,  
1014 159, 1484-1493.
- 1015 HRABOVSKY, E., CSAPO, A. K., KALLO, I., WILHEIM, T., TURI, G. F. & LIPOSITS, Z. 2006.  
1016 Localization and osmotic regulation of vesicular glutamate transporter-2 in  
1017 magnocellular neurons of the rat hypothalamus. *Neurochem Int*, 48, 753-61.
- 1018 HUGHES, D. I., BOYLE, K. A., KINNON, C. M., BILSLAND, C., QUAYLE, J. A., CALLISTER, R. J. &  
1019 GRAHAM, B. A. 2013. HCN4 subunit expression in fast-spiking interneurons of the rat  
1020 spinal cord and hippocampus. *Neuroscience*, 237, 7-18.
- 1021 KATO, G., KOSUGI, M., MIZUNO, M. & STRASSMAN, A. M. 2011. Separate inhibitory and  
1022 excitatory components underlying receptive field organization in superficial medullary  
1023 dorsal horn neurons. *J Neurosci*, 31, 17300-5.
- 1024 LU, Y., DONG, H., GAO, Y., GONG, Y., REN, Y., GU, N., ZHOU, S., XIA, N., SUN, Y.-Y., JI, R.-R. &  
1025 XIONG, L. 2013. A feed-forward spinal cord glycinergic neural circuit gates mechanical  
1026 allodynia. *The Journal of Clinical Investigation*, 123, 4050-4062.
- 1027 LU, Y. & PERL, E. R. 2003. A specific inhibitory pathway between substantia gelatinosa  
1028 neurons receiving direct C-fiber input. *J Neurosci*, 23, 8752-8.
- 1029 LU, Y. & PERL, E. R. 2005. Modular organization of excitatory circuits between neurons of the  
1030 spinal superficial dorsal horn (laminae I and II). *J Neurosci*, 25, 3900-7.
- 1031 LUI, F. & NG, K. F. 2011. Adjuvant analgesics in acute pain. *Expert Opin Pharmacother*, 12, 363-  
1032 85.
- 1033 LUO, C., KUNER, T. & KUNER, R. 2014. Synaptic plasticity in pathological pain. *Trends Neurosci*,  
1034 37, 343-55.
- 1035 MEYER, A. H., KATONA, I., BLATOW, M., ROZOV, A. & MONYER, H. 2002. In vivo labeling of  
1036 parvalbumin-positive interneurons and analysis of electrical coupling in identified  
1037 neurons. *J Neurosci*, 22, 7055-64.
- 1038 MIRAUCOURT, L. S., DALLEL, R. & VOISIN, D. L. 2007. Glycine inhibitory dysfunction turns  
1039 touch into pain through PKCgamma interneurons. *PLoS One*, 2, e1116.
- 1040 MOORE, K. A., KOHNO, T., KARCHEWSKI, L. A., SCHOLZ, J., BABA, H. & WOOLF, C. J. 2002.  
1041 Partial peripheral nerve injury promotes a selective loss of GABAergic inhibition in the  
1042 superficial dorsal horn of the spinal cord. *J Neurosci*, 22, 6724-31.
- 1043 NAKAMURA, M., SATO, K., FUKAYA, M., ARAISHI, K., AIBA, A., KANO, M. & WATANABE, M.  
1044 2004. Signaling complex formation of phospholipase Cbeta4 with metabotropic  
1045 glutamate receptor type 1alpha and 1,4,5-trisphosphate receptor at the perisynapse and  
1046 endoplasmic reticulum in the mouse brain. *Eur J Neurosci*, 20, 2929-44.

- 1047 NEUMANN, S., BRAZ, J. M., SKINNER, K., LLEWELLYN-SMITH, I. J. & BASBAUM, A. I. 2008.  
1048 Innocuous, not noxious, input activates PKCgamma interneurons of the spinal dorsal  
1049 horn via myelinated afferent fibers. *J Neurosci*, 28, 7936-44.
- 1050 PAXINOS, G. & FRANKLIN, K. 2001. *The mouse brain in stereotaxic coordinates (2nd edition)*,  
1051 Academic Press.
- 1052 PEIRS, C. & SEAL, R. P. 2016. Neural circuits for pain: Recent advances and current views.  
1053 *Science*, 354, 578-584.
- 1054 PEIRS, C., WILLIAMS, S.-P. G., ZHAO, X., WALSH, C. E., GEDEON, J. Y., CAGLE, N. E., GOLDRING,  
1055 A. C., HIOKI, H., LIU, Z., MARELL, P. S. & SEAL, R. P. 2015. Dorsal Horn Circuits for  
1056 Persistent Mechanical Pain. *Neuron*, 87, 797-812.
- 1057 PETITJEAN, H., PAWLOWSKI, SOPHIE A., FRAINE, STEVEN L., SHARIF, B., HAMAD, D., FATIMA,  
1058 T., BERG, J., BROWN, CLAIRE M., JAN, L.-Y., RIBEIRO-DA-SILVA, A., BRAZ, JOAO M.,  
1059 BASBAUM, ALLAN I. & SHARIF-NAEINI, R. 2015. Dorsal Horn Parvalbumin Neurons Are  
1060 Gate-Keepers of Touch-Evoked Pain after Nerve Injury. *Cell Reports*, 13, 1246-1257.
- 1061 POLGAR, E., DURRIEUX, C., HUGHES, D. I. & TODD, A. J. 2013. A quantitative study of inhibitory  
1062 interneurons in laminae I-III of the mouse spinal dorsal horn. *PLoS One*, 8, e78309.
- 1063 PRICE, T. J. & PRESCOTT, S. A. 2015. Inhibitory regulation of the pain gate and how its failure  
1064 causes pathological pain. *Pain*, 156, 789-92.
- 1065 PROUDLOCK, F., SPIKE, R. C. & TODD, A. J. 1993. Immunocytochemical study of somatostatin,  
1066 neurotensin, GABA, and glycine in rat spinal dorsal horn. *J Comp Neurol*, 327, 289-97.
- 1067 PTAK, K., BURNET, H., BLANCHI, B., SIEWEKE, M., DE FELIPE, C., HUNT, S. P., MONTEAU, R. &  
1068 HILAIRE, G. 2002. The murine neurokinin NK1 receptor gene contributes to the adult  
1069 hypoxic facilitation of ventilation. *Eur J Neurosci*, 16, 2245-52.
- 1070 PUNNAKKAL, P., VON SCHOULTZ, C., HAENRAETS, K., WILDNER, H. & ZEILHOFER, H. U. 2014.  
1071 Morphological, biophysical and synaptic properties of glutamatergic neurons of the  
1072 mouse spinal dorsal horn. *J Physiol*, 592, 759-76.
- 1073 ROSS, S. E., MARDINLY, A. R., MCCORD, A. E., ZURAWSKI, J., COHEN, S., JUNG, C., HU, L., MOK, S.  
1074 I., SHAH, A., SAVNER, E., TOLIAS, C., CORFAS, R., CHEN, S., INQUIMBERT, P., XU, Y.,  
1075 MCINNES, R. R., RICE, F. L., CORFAS, G., MA, Q., WOOLF, C. J. & GREENBERG, M. E. 2010.  
1076 Loss of inhibitory interneurons in the dorsal spinal cord and elevated itch in Bhlhb5  
1077 mutant mice. *Neuron*, 65, 886-898.
- 1078 SANTOS, S. F., REBELO, S., DERKACH, V. A. & SAFRONOV, B. V. 2007. Excitatory interneurons  
1079 dominate sensory processing in the spinal substantia gelatinosa of rat. *J Physiol*, 581,  
1080 241-54.
- 1081 SCHIFFMANN, S. N., CHERON, G., LOHOF, A., D'ALCANTARA, P., MEYER, M., PARMENTIER, M.  
1082 & SCHURMANS, S. 1999. Impaired motor coordination and Purkinje cell excitability in  
1083 mice lacking calretinin. *Proc Natl Acad Sci U S A*, 96, 5257-62.
- 1084 SCHWARZ, L. A., MIYAMICHI, K., GAO, X. J., BEIER, K. T., WEISSBOURD, B., DELOACH, K. E.,  
1085 REN, J., IBANES, S., MALENKA, R. C., KREMER, E. J. & LUO, L. 2015. Viral-genetic tracing  
1086 of the input-output organization of a central noradrenergic circuit. *Nature*, 524, 88-92.
- 1087 SMITH, K. M., BOYLE, K. A., MADDEN, J. F., DICKINSON, S. A., JOBLING, P., CALLISTER, R. J.,  
1088 HUGHES, D. I. & GRAHAM, B. A. 2015. Functional heterogeneity of calretinin-expressing  
1089 neurons in the mouse superficial dorsal horn: implications for spinal pain processing. *J*  
1090 *Physiol*, 593, 4319-39.
- 1091 SMITH, K. M., BOYLE, K. A., MUSTAPA, M., JOBLING, P., CALLISTER, R. J., HUGHES, D. I. &  
1092 GRAHAM, B. A. 2016. Distinct forms of synaptic inhibition and neuromodulation regulate  
1093 calretinin-positive neuron excitability in the spinal cord dorsal horn. *Neuroscience*, 326,  
1094 10-21.
- 1095 TAKAZAWA, T. & MACDERMOTT, A. B. 2010. Synaptic pathways and inhibitory gates in the  
1096 spinal cord dorsal horn. *Ann N Y Acad Sci*, 1198, 153-8.

- 1097 TAMAS, G., BUHL, E. H., LORINCZ, A. & SOMOGYI, P. 2000. Proximally targeted GABAergic  
1098 synapses and gap junctions synchronize cortical interneurons. *Nat Neurosci*, 3, 366-71.
- 1099 TODD, A. J. 2010. Neuronal circuitry for pain processing in the dorsal horn. *Nat Rev Neurosci*,  
1100 11, 823-36.
- 1101 TORSNEY, C. & MACDERMOTT, A. B. 2006. Disinhibition opens the gate to pathological pain  
1102 signaling in superficial neurokinin 1 receptor-expressing neurons in rat spinal cord. *J*  
1103 *Neurosci*, 26, 1833-43.
- 1104 WOODRUFF, A. R. & SAH, P. 2007. Inhibition and synchronization of basal amygdala principal  
1105 neuron spiking by parvalbumin-positive interneurons. *J Neurophysiol*, 98, 2956-61.
- 1106 WOOLF, C. J. & FITZGERALD, M. 1983. The properties of neurones recorded in the superficial  
1107 dorsal horn of the rat spinal cord. *J Comp Neurol*, 221, 313-28.
- 1108 YU, F., ZHAO, Z.-Y., HE, T., YU, Y.-Q., LI, Z. & CHEN, J. 2017. Temporal and spatial dynamics of  
1109 peripheral afferent-evoked activity in the dorsal horn recorded in rat spinal cord slices.  
1110 *Brain Research Bulletin*, 131, 183-191.
- 1111 ZEILHOFER, H. U. 2005. The glycinergic control of spinal pain processing. *Cell Mol Life Sci*, 62,  
1112 2027-35.
- 1113 ZEILHOFER, H. U., WILDNER, H. & YEVENES, G. E. 2012. Fast synaptic inhibition in spinal  
1114 sensory processing and pain control. *Physiol Rev*, 92, 193-235.
- 1115
- 1116
- 1117
- 1118



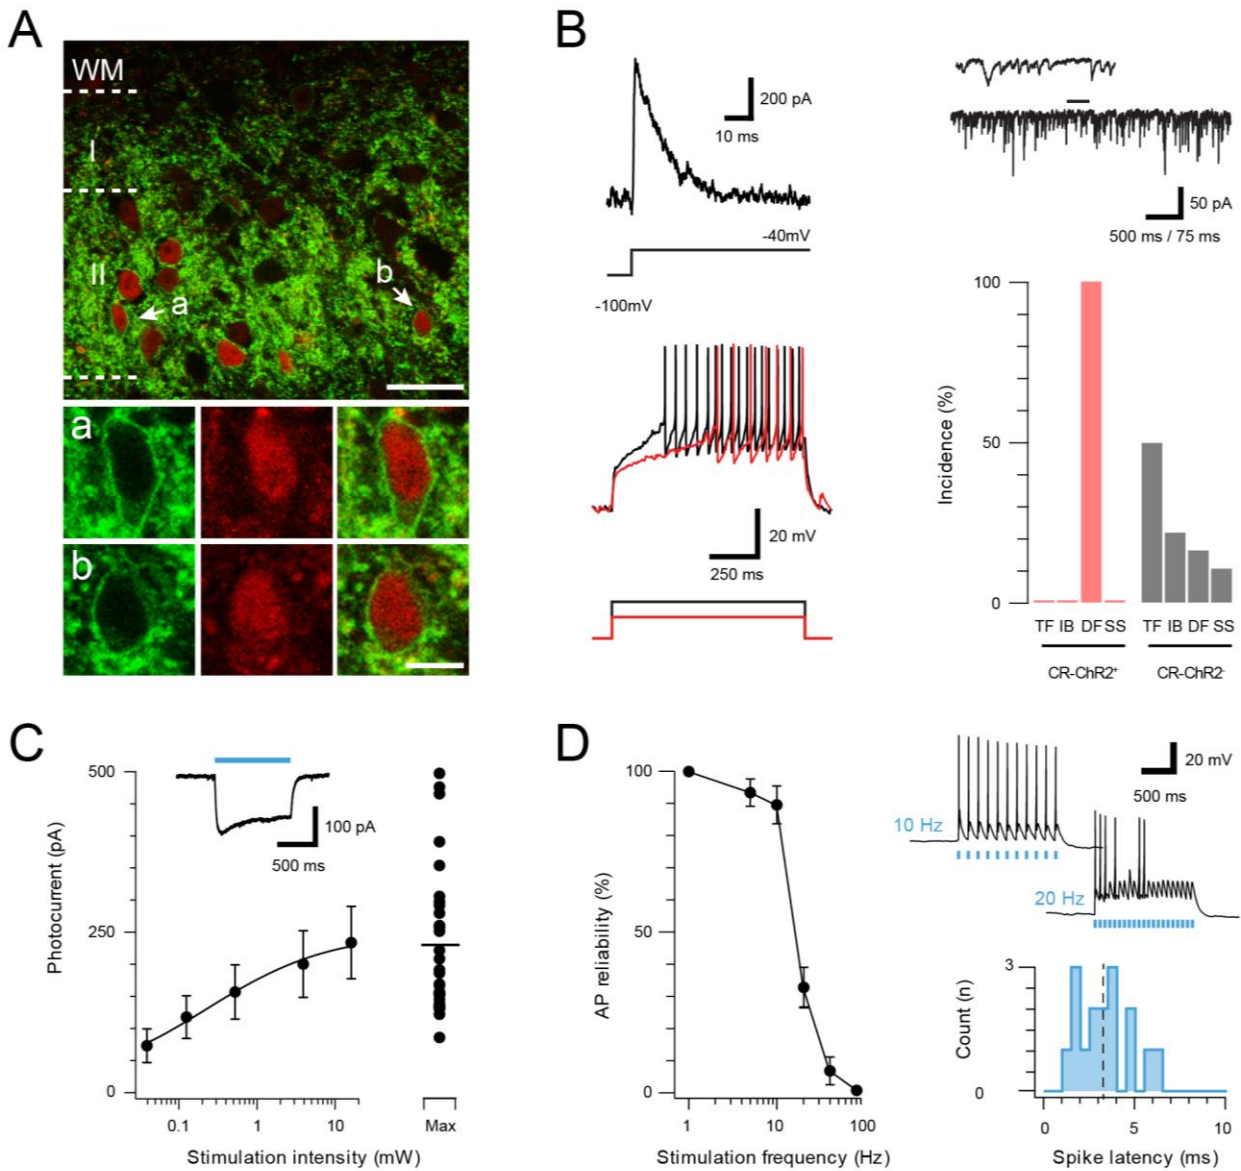

1119

1120 **Supplementary Figure 1. ChR2 expression in Excitatory CR<sup>+</sup> neurons.** (A), Upper panel compares  
 1121 ChR2YFP-IR (green) and CR-IR profiles (red). There is a high degree of colocalization in LII ( $71 \pm 2\%$   
 1122 ChR2YFP-IR neurons express CR-IR, and  $78 \pm 4\%$  of CR-IR neurons express ChR2YFP-IR). Lower panels  
 1123 show neurons denoted 'a' and 'b' from upper panel at high magnification; ChR2YFP-IR (left), CR-IR  
 1124 (right), merge (center), scale =  $25\mu\text{m}$  (upper) and  $5\mu\text{m}$  (lower). (B), Excitatory CR<sup>+</sup> neurons exhibited  
 1125 several characteristic electrophysiological features including the voltage gated potassium current  $I_a$  (upper  
 1126 left, protocol below), high frequency spontaneous excitatory drive (upper right), and delayed firing (DF)  
 1127 discharge in response to depolarizing current injection (lower left, current step protocol below). Bar graph  
 1128 (lower, right) highlights the uniform incidence of DF-AP discharge in excitatory CR<sup>+</sup> positive neurons (red)  
 1129 when compared to a random sample of CR negative neurons (grey) in the same region (TF = tonic firing, IB  
 1130 = Initial bursting, DF = Delayed firing, SS = Single spiking). (C), Plot shows relationship between  
 1131 photostimulation intensities (0.039-16 mW) and photocurrent amplitude, error bars = SEM. Note maximum  
 1132 photostimulation intensity (16 mW) shows photocurrent data for individual recordings. Inset, example  
 1133 photocurrent response with blue bar indicating photostimulus duration. (D), Plot (left) shows reliability of  
 1134 evoked AP discharge at various photostimulation frequencies. APs were reliably evoked by frequencies up to  
 1135 10 Hz. Representative traces (upper, right) showing reliable responses at 10 Hz but not 20 Hz  
 1136 photostimulation. Histogram (lower, right) shows the distribution of recruitment latency (time between the  
 1137 onset of photostimulation and the AP response) for CR-ChR2 recordings (dashed line shows mean of 3.2  
 1138 ms).

1139

1140

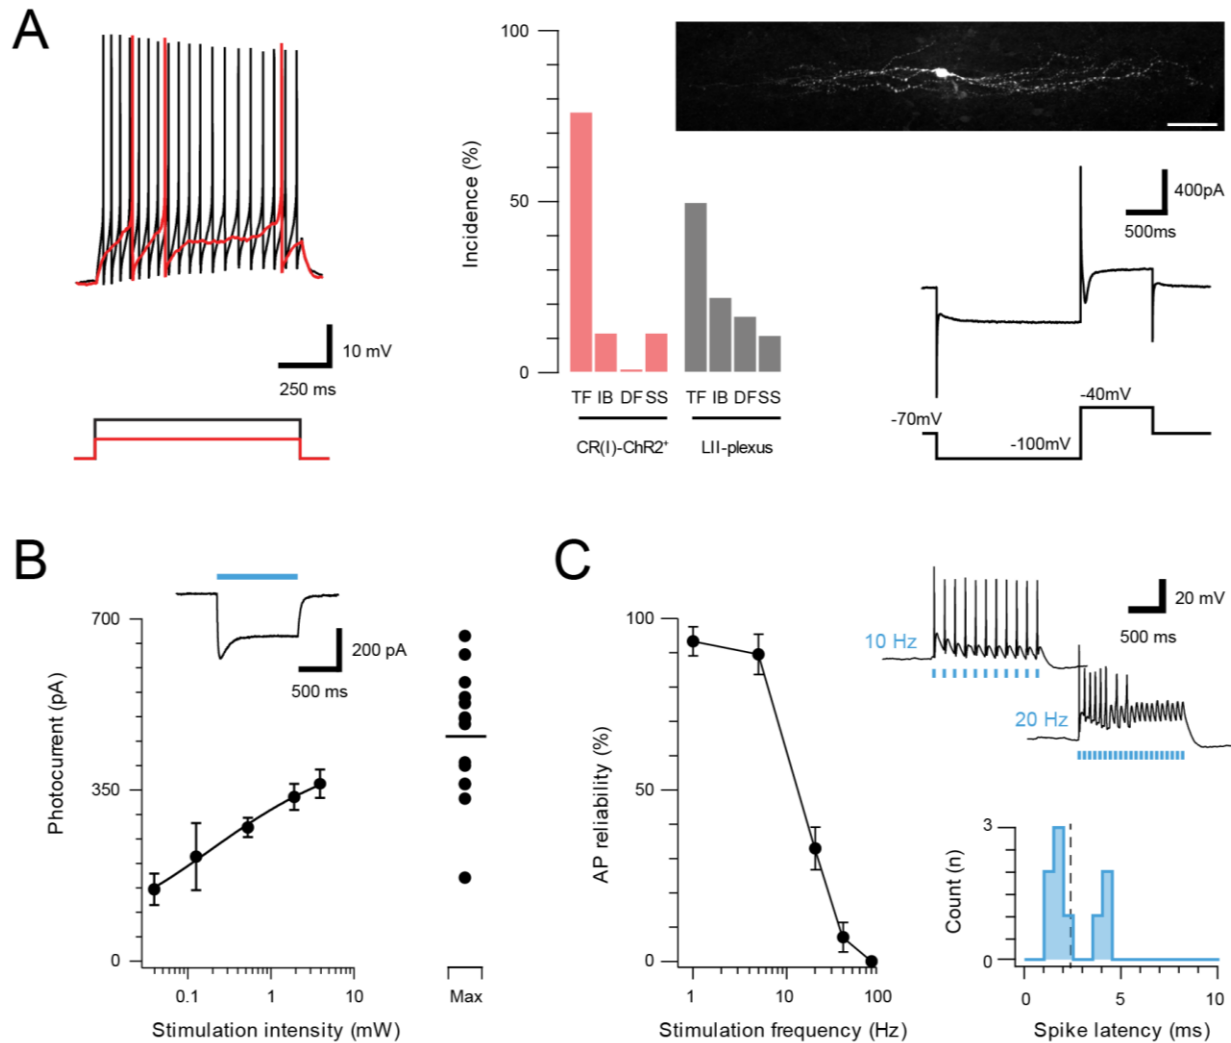

1141

1142

1143

1144

1145

1146

1147

1148

1149

1150

1151

1152

1153

1154

1155

1156

1157

1158

**Supplementary Figure 2. Inhibitory CR neurons express ChR2.** A subset of inhibitory CR<sup>+</sup> neurons, identified by extensive rostrocaudal processes, exhibited characteristic electrophysiological features described in previous work<sup>5</sup>. (A) Most inhibitory CR<sup>+</sup> cells responded with a tonic AP discharge (top left, protocol below). Bar graph (middle) shows elevated incidence of tonic discharge in inhibitory CR<sup>+</sup> neurons when compared to a random sample of CR negative neurons (grey) from the same region (TF = tonic firing, IB = Initial bursting, DF = Delayed firing, SS = Single spiking). All neurobiotin-recovered inhibitory CR<sup>+</sup> neurons exhibited islet like morphology (upper, right, scale = 20  $\mu$ m) and expressed the I<sub>h</sub> and I<sub>Ca</sub> voltage activated currents (lower right, protocol below). (B), Group data for photocurrent amplitude at different light intensities (0.039-16 mW; error bars = SEM). Inset shows example photocurrent response for a 1 s blue light stimulus, blue bar highlights photostimulus duration. Note, maximum photostimulation intensity (16 mW) shows photocurrent data for individual recordings. (C), Plot (left) shows reliability of evoked AP discharge at various photostimulation frequencies. APs were reliably evoked for stimulation frequencies of up to 10 Hz. Representative traces (upper, right) showing reliable responses at 10 Hz but not 20 Hz photostimulation. Histogram (lower, right) shows the distribution of recruitment latency (time between the onset of photostimulation and the AP response) for CR-ChR2<sup>+</sup> recordings (dashed line = mean, 2.2 ms).

## A Excitatory postsynaptic input

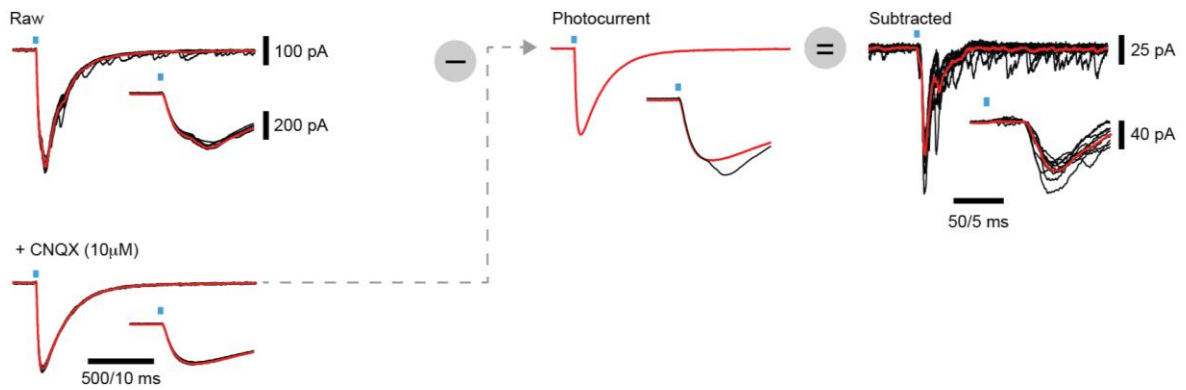

## B Inhibitory postsynaptic input

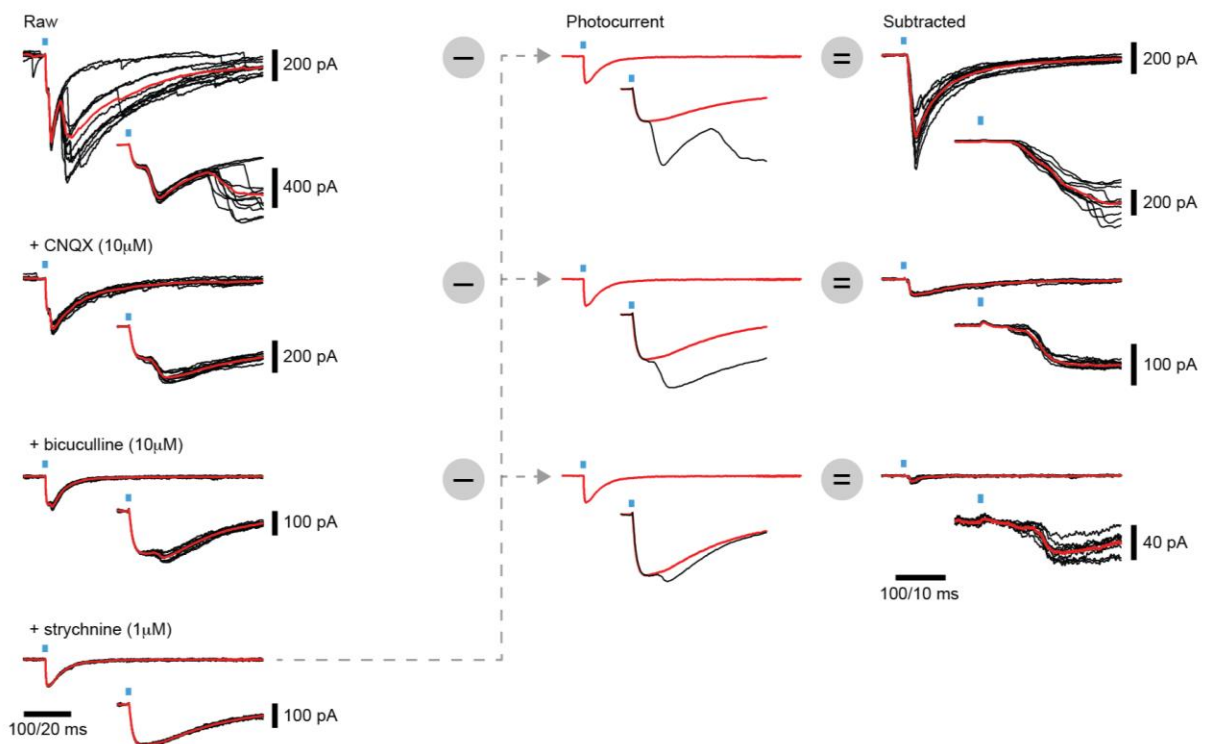

1159

1160 **Supplementary Figure 3. Isolation of synaptic responses in CR-ChR2<sup>+</sup> neurons by photocurrent**  
 1161 **subtraction.** (A), overlaid traces (left) show voltage clamp recordings of excitatory responses to 10  
 1162 photostimulation sweeps (average in red) under baseline conditions (upper) and after bath addition of  
 1163 CNQX (10 μM). Insets show expanded response onset (blue bar highlights photostimulus). Note  
 1164 baseline response has two components at onset, the photocurrent and a synaptic current, but only the  
 1165 synaptic component is blocked by CNQX. The averaged photocurrent is isolated, rescaled to match  
 1166 the amplitude in individual baseline traces (middle), and then subtracted to yield isolated synaptic  
 1167 responses (right) to CR-ChR2 photostimulation. (B), overlaid traces arranged as in A, except voltage  
 1168 clamp recordings are inhibitory responses at baseline (upper), and after bath addition of CNQX (10 μM),  
 1169 bicuculline (10 μM), and strychnine (1 μM). Note multiple components at onset including both photocurrents  
 1170 and a synaptic current, but CNQX bicuculline, and strychnine are required to isolate the photocurrent.  
 1171 Photocurrent subtraction is then performed for each drug condition to yield the total inhibitory response with  
 1172 monosynaptic and polysynaptic components (upper), the monosynaptic inhibitory response (middle), and the  
 1173 glycinergic inhibitory response (lower) to CR-ChR2 photostimulation.  
 1174

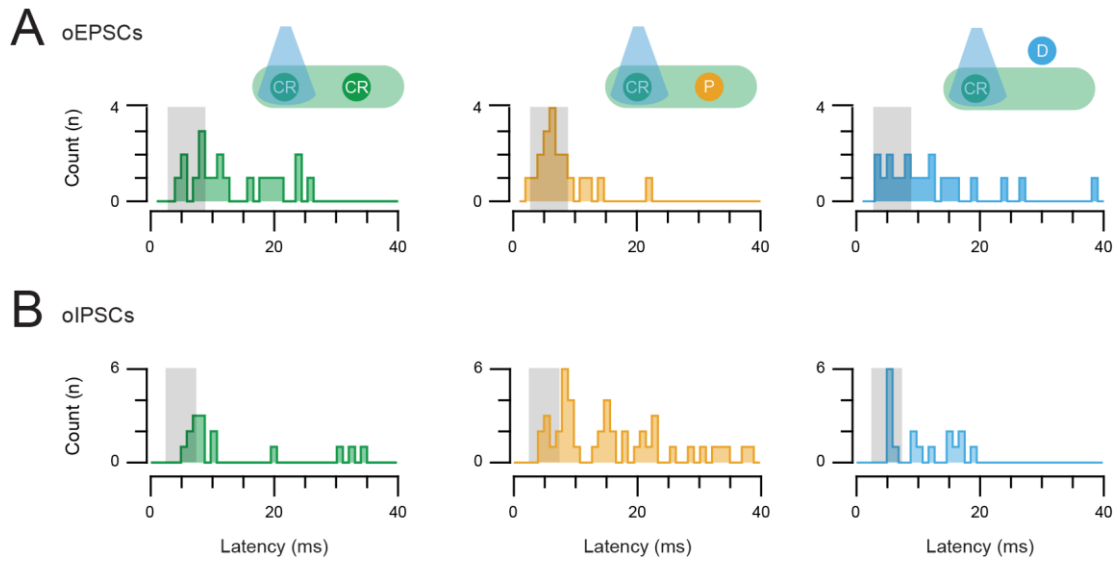

1175

1176

1177

1178

1179

1180

1181

1182

1183

**Supplementary Figure 4. Photostimulation response latencies for oEPSC and oIPSC inputs.** (A-B) The latency of all photostimulation response components (oEPSCs and oIPSCs, respectively) were measured and pooled for CR-ChR2 recordings, neurons within the CR<sup>+</sup> plexus, and neurons dorsal to this region. Peristimulus histograms plot the onset latency of all synaptic responses components for each population (CR<sup>+</sup>, plexus, and dorsal). Grey box indicates the latency window for putative direct (monosynaptic) inputs. Note a proportion of responses in all populations exhibit latencies consistent with direct and indirect input.

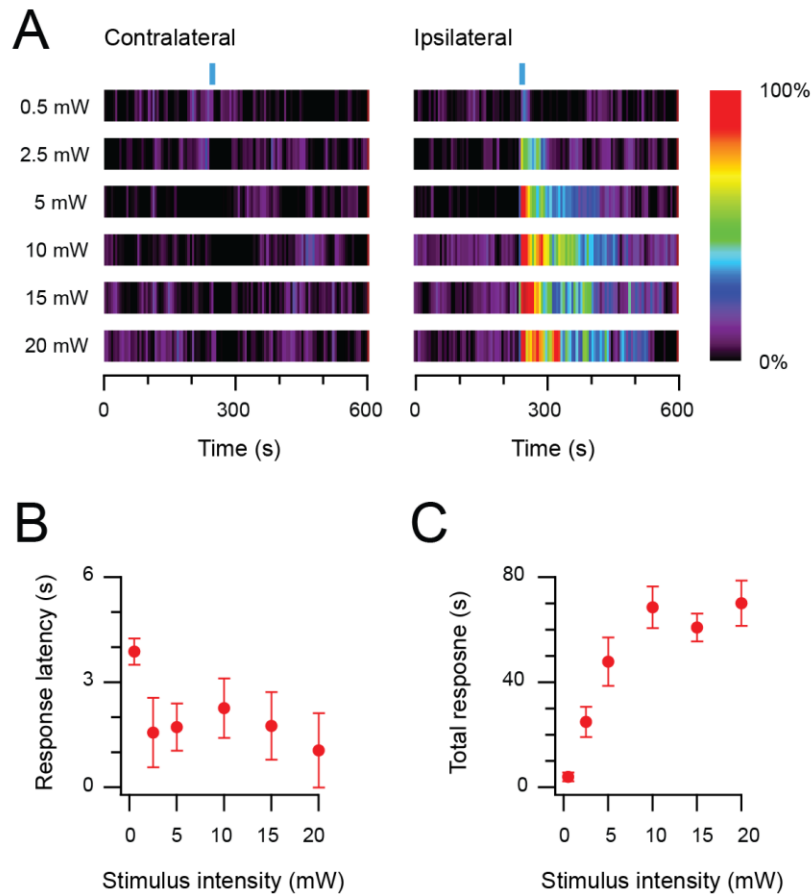

1184

1185 **Supplementary Figure 5. Photostimulation evokes an intensity dependent nociceptive behavioural**  
1186 **response in *CR<sup>cre</sup>;Ai32* mice.** (A), Heat bars show averaged photostimulation (blue bar denotes  
1187 photostimulation period) responses targeted to the contralateral hindlimb (left) and ipsilateral (right)  
1188 hindlimb as photostimulus intensity is increased (0.5 – 20 mW, 10 Hz, 10 s). Responses are binned in 5 s  
1189 epochs with bin color coding the percent time groomed (red = 100%, black = 0%). Responses increased with  
1190 photostimulation intensity and were focused to the ipsilateral hindlimb. (B), Plots compare response latency,  
1191 and total response as stimulus intensity is increased. Note, at lower stimulus intensities some animals did not  
1192 exhibit responses during the photostimulation period, and total response durations increased with  
1193 photostimulation intensity before stabilizing between 10-15 mW.  
1194

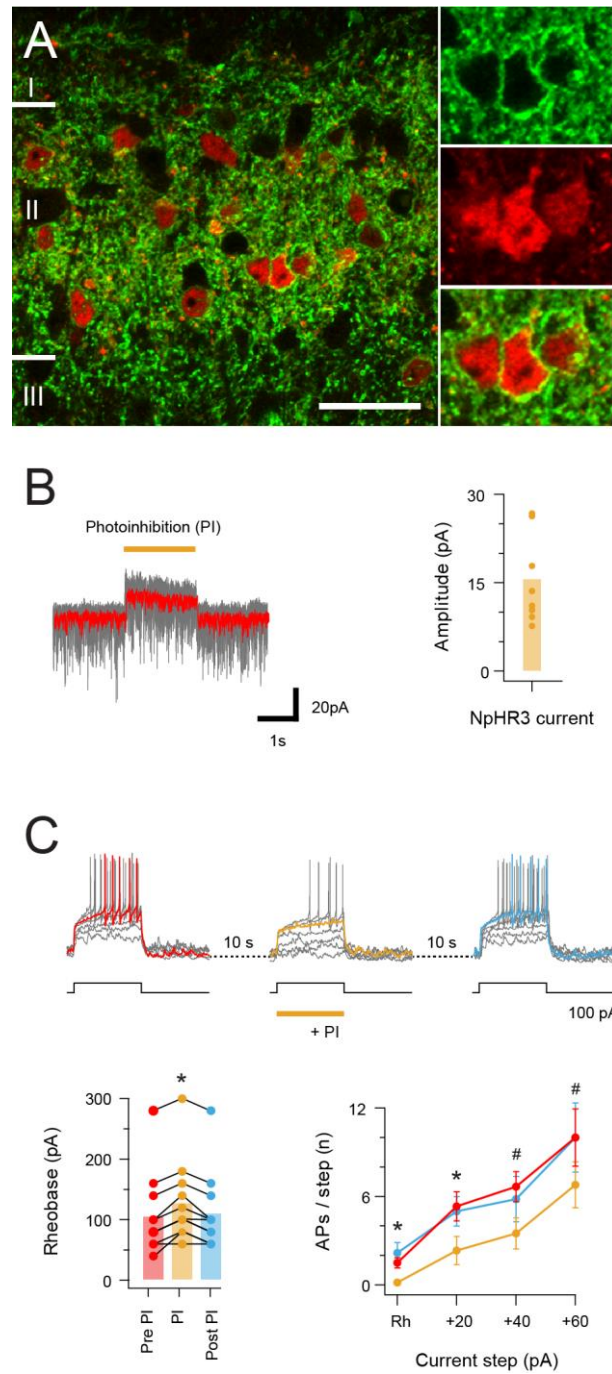

1195

1196

1197

1198

1199

1200

1201

1202

1203

1204

1205

1206

1207

1208

1209

1210

**Supplementary Figure 6. Halorhodopsin-mediated photoinhibition of CR<sup>+</sup> neurons in CR<sub>cre</sub>;Ai32 mice.**

(A), Image panels (left) compare NpHR3YFP-IR (green) and CR-IR profiles (red). There is a high incidence of colocalisation of CR-IR in NpHR3YFP-IR neurons in laminae I and II (82.2%,  $\pm$  1.27), and of YFP expression in CR-IR neurons (94.1%,  $\pm$  4.27). Scale bar = 20  $\mu$ m. (B), Traces (right) are overlaid recordings from a CR<sup>+</sup> neuron during NpHR3-mediated photoinhibition (orange bar). The average response (red trace) highlight a stimulus-locked outward current resulting from NpHR3 activation. Plot (right) shows group data for NpHR3 current amplitude during photoinhibition. (C), Overlaid traces show CR<sup>+</sup> neuron recording during 3 successive series of depolarizing current injection (20 pA increments, 800 ms duration) to activate AP discharge, separated by 10 s intervals. Sustained NpHR3-mediated photoinhibition was applied for the second current injection series. Photoinhibition suppressed current-evoked AP discharge, highlighted in group data plots comparing rheobase current (lower left) and current step versus AP number (lower right) during photostimulation with these properties pre- and post-photostimulation.
